# Supplementary material
Source: PubMed Central journal article supplement (PMC6251619)
Supplement: piw066_suppl_supplementary_table_1.pdf [file piw066_suppl_supplementary_table_1.pdf]

**Supplementary Table 1.** Sequencing statistics

| Sample Description              | DNA/RNA library | % Reads Passing Quality Control | # of Raw Reads | # of Reads after Quality Filtering and Adapter Trimming | # of Reads Aligned to Human / Primate | # of Non-Human / Primate Reads | % Human / Primate Reads | # of Reads Aligned to NCBI NT database |
|---------------------------------|-----------------|---------------------------------|----------------|---------------------------------------------------------|---------------------------------------|--------------------------------|-------------------------|----------------------------------------|
| No Template Control (NTC)       | DNA             | 84.3                            | 6,664,047      | 5,619,424                                               | 539,093                               | 5,080,331                      | 9.6                     | 3,848,762                              |
| No Template Control (NTC)       | RNA             | 59.1                            | 13,243,517     | 7,829,946                                               | 2,174,615                             | 5,655,331                      | 27.8                    | 3,065,872                              |
| External Positive Control (PC)* | DNA             | 62.9                            | 15,488,998     | 9,735,493                                               | 9,154,273                             | 581,220                        | 94.0                    | 469,147                                |
| External Positive Control (PC)* | RNA             | 64.8                            | 6,841,850      | 4,433,299                                               | 1,550,481                             | 2,882,818                      | 35.0                    | 1,616,732                              |
| Analytical Sample               | DNA             | 67.8                            | 23,638,587     | 16,037,745                                              | 15,999,078                            | 38,667                         | 99.8                    | 24,156                                 |
| Analytical Sample               | RNA             | 80.8                            | 9,161,626      | 7,400,632                                               | 5,635,904                             | 1,764,728                      | 76.2                    | 889,944                                |

\*7 organism positive control mixture of CMV, HIV, *Streptococcus agalactiae*, *Klebsiella pneumoniae*, *Cryptococcus neoformans*, *Aspergillus niger*, and *Toxoplasma gondii*

Abbreviations: NTC, no template control; PC, positive control; NCBI, National Center for Biotechnology Information, NT, nucleotide
