# Supplementary material
Source: PubMed Central journal article supplement (PMC6251619)
Supplement: piw066_suppl_supplementary_table_2.pdf [file piw066_suppl_supplementary_table_2.pdf]

**Supplementary Table 2.** Number of reads from the DNA or RNA mNGS library aligning to viral sequences.

\*re-classified to a higher taxonomic rank because reads aligned equally well to multiple different organisms that shared the same species, genus or family

| species <sup>a</sup>           | genus               | family           | host              | DNA NTC | RNA NTC |
|--------------------------------|---------------------|------------------|-------------------|---------|---------|
| Human mastadenovirus F         | Mastadenovirus      | Adenoviridae     | human vertebrates | 0       | 68      |
| GB virus C                     | Pegivirus           | Flaviviridae     | human vertebrates | 0       | 0       |
| Cercopithecine herpesvirus 5   | Cytomegalovirus     | Herpesviridae    | human vertebrates | 0       | 32      |
| Human herpesvirus 5            | Cytomegalovirus     | Herpesviridae    | human vertebrates | 0       | 0       |
| *                              | *                   | Papillomaviridae | human vertebrates | 1       | 0       |
| Alphapapillomavirus 2          | Alphapapillomavirus | Papillomaviridae | human vertebrates | 39      | 16      |
| Betapapillomavirus 1           | Betapapillomavirus  | Papillomaviridae | human vertebrates | 0       | 30      |
| Betapapillomavirus 2           | Betapapillomavirus  | Papillomaviridae | human vertebrates | 0       | 0       |
| *                              | Lentivirus          | Retroviridae     | human vertebrates | 0       | 0       |
| Human immunodeficiency virus   | Lentivirus          | Retroviridae     | human vertebrates | 0       | 0       |
| Human immunodeficiency virus 1 | Lentivirus          | Retroviridae     | human vertebrates | 0       | 0       |
| Simian-Human immunodeficiency  | Lentivirus          | Retroviridae     | human vertebrates | 0       | 0       |
| Gammapapillomavirus 1          | Gammapapillomavirus | Papillomaviridae | vertebrates       | 14      | 0       |
| Gammapapillomavirus 10         | Gammapapillomavirus | Papillomaviridae | vertebrates       | 0       | 12      |

<sup>a</sup>Viruses assigned to bacterial, plant, insect, parasitic, or fungal hosts are not shown

Abbreviations: NTC, no template control; PC, positive control; CSF, cerebrospinal fluid; mNGS, metagenomic next-generation sequencing

| DNA PC | RNA PC | DNA Patient CSF | RNA Patient CSF |
|--------|--------|-----------------|-----------------|
| 0      | 0      | 0               | 0               |
| 0      | 1,406  | 0               | 2               |
| 0      | 0      | 0               | 0               |
| 3,026  | 0      | 0               | 0               |
| 0      | 0      | 0               | 0               |
| 0      | 0      | 0               | 0               |
| 0      | 0      | 0               | 0               |
| 0      | 0      | 0               | 72              |
| 0      | 172    | 0               | 0               |
| 0      | 1      | 0               | 0               |
| 0      | 3,895  | 0               | 0               |
| 0      | 57     | 0               | 0               |
| 0      | 0      | 0               | 0               |
| 0      | 60     | 0               | 0               |
