# Supplementary material
Source: PubMed Central journal article supplement (PMC6251619)
Supplement: piw066_suppl_supplementary_table_3.pdf [file piw066_suppl_supplementary_table_3.pdf]

**Supplementary Table 3.** Number of reads from DNA mNGS library aligning to bacterial sequences. Results are shown from both the patient's sample, NTC, and the PC sample.

\*re-classified to a higher taxonomic rank because reads aligned equally well to multiple different organisms that shared the same species, genus or family

Abbreviations: NTC, no template control; PC, positive control; CSF, cerebrospinal fluid; mNGS, metagenomic next-generation sequencing

| species                         | genus                 | family                | # of Reads |        |                 |
|---------------------------------|-----------------------|-----------------------|------------|--------|-----------------|
|                                 |                       |                       | DNA NTC    | DNA PC | DNA Patient CSF |
| *                               | Brucella              | Brucellaceae          | 0          | 0      | 251             |
| Brucella melitensis             | Brucella              | Brucellaceae          | 0          | 0      | 26              |
| Streptococcus agalactiae        | Streptococcus         | Streptococcaceae      | 9          | 50,894 | 0               |
| Klebsiella pneumoniae           | Klebsiella            | Enterobacteriaceae    | 426        | 39,013 | 4               |
| *                               | *                     | Enterobacteriaceae    | 246,369    | 21,342 | 2,350           |
| Escherichia coli                | Escherichia           | Enterobacteriaceae    | 170,966    | 11,959 | 1,601           |
| Propionibacterium acnes         | Propionibacterium     | Propionibacteriaceae  | 126,533    | 5,329  | 1,158           |
| *                               | Streptococcus         | Streptococcaceae      | 236        | 3,556  | 2               |
| *                               | Klebsiella            | Enterobacteriaceae    | 49         | 3,542  | 0               |
| *                               | *                     | *                     | 41,826     | 3,194  | 457             |
| Streptococcus suis              | Streptococcus         | Streptococcaceae      | 20         | 561    | 0               |
| Streptococcus salivarius        | Streptococcus         | Streptococcaceae      | 188        | 333    | 13              |
| Streptococcus pyogenes          | Streptococcus         | Streptococcaceae      | 0          | 299    | 0               |
| Serratia marcescens             | Serratia              | Enterobacteriaceae    | 59         | 233    | 0               |
| Lactococcus lactis              | Lactococcus           | Streptococcaceae      | 338        | 223    | 2               |
| *                               | Escherichia           | Enterobacteriaceae    | 3,865      | 210    | 35              |
| Pseudomonas sp. TKP             | Pseudomonas           | Pseudomonadaceae      | 941        | 205    | 69              |
| *                               | Pseudomonas           | Pseudomonadaceae      | 499        | 185    | 11              |
| Streptococcus macedonicus       | Streptococcus         | Streptococcaceae      | 0          | 177    | 0               |
| Enterobacter cloacae            | Enterobacter          | Enterobacteriaceae    | 235        | 160    | 1               |
| Klebsiella oxytoca              | Klebsiella            | Enterobacteriaceae    | 102        | 129    | 4               |
| Thermoanaerobacterium thermosum | Thermoanaerobacterium | Thermoanaerobacterale | 268        | 107    | 2               |
| Streptococcus sp. VT 162        | Streptococcus         | Streptococcaceae      | 90         | 100    | 0               |
| Enterococcus faecium            | Enterococcus          | Enterococcaceae       | 526        | 96     | 85              |
| Pseudomonas protegens           | Pseudomonas           | Pseudomonadaceae      | 17         | 87     | 3               |
| Micrococcus luteus              | Micrococcus           | Micrococcaceae        | 6,424      | 78     | 3               |
| Streptococcus infantarius       | Streptococcus         | Streptococcaceae      | 94         | 75     | 0               |
| Staphylococcus epidermidis      | Staphylococcus        | Staphylococcaceae     | 8,168      | 74     | 13              |

|                                        |                          |                      |       |    |    |
|----------------------------------------|--------------------------|----------------------|-------|----|----|
| <i>Enterobacter asburiae</i>           | <i>Enterobacter</i>      | Enterobacteriaceae   | 250   | 65 | 0  |
| <i>Cupriavidus metallidurans</i>       | <i>Cupriavidus</i>       | Burkholderiaceae     | 934   | 61 | 0  |
| <i>Pseudomonas putida</i>              | <i>Pseudomonas</i>       | Pseudomonadaceae     | 300   | 57 | 1  |
| <i>Enterococcus casseliflavus</i>      | <i>Enterococcus</i>      | Enterococcaceae      | 371   | 54 | 79 |
| <i>Streptococcus mitis</i>             | <i>Streptococcus</i>     | Streptococcaceae     | 55    | 53 | 0  |
| <i>Streptococcus equi</i>              | <i>Streptococcus</i>     | Streptococcaceae     | 0     | 51 | 0  |
| <i>Salmonella enterica</i>             | <i>Salmonella</i>        | Enterobacteriaceae   | 1     | 48 | 0  |
| <i>Streptococcus oralis</i>            | <i>Streptococcus</i>     | Streptococcaceae     | 51    | 47 | 0  |
| <i>Klebsiella variicola</i>            | <i>Klebsiella</i>        | Enterobacteriaceae   | 0     | 42 | 0  |
| <i>Burkholderia lata</i>               | <i>Burkholderia</i>      | Burkholderiaceae     | 85    | 40 | 3  |
| <i>Pseudomonas stutzeri</i>            | <i>Pseudomonas</i>       | Pseudomonadaceae     | 1,094 | 40 | 32 |
| <i>Streptococcus pneumoniae</i>        | <i>Streptococcus</i>     | Streptococcaceae     | 63    | 39 | 3  |
| <i>Streptococcus dysgalactiae</i>      | <i>Streptococcus</i>     | Streptococcaceae     | 3     | 36 | 0  |
| *                                      | <i>Burkholderia</i>      | Burkholderiaceae     | 171   | 35 | 18 |
| <i>Pseudomonas fluorescens</i>         | <i>Pseudomonas</i>       | Pseudomonadaceae     | 50    | 35 | 4  |
| <i>Acinetobacter guillouiae</i>        | <i>Acinetobacter</i>     | Moraxellaceae        | 207   | 35 | 4  |
| <i>Veillonella parvula</i>             | <i>Veillonella</i>       | Veillonellaceae      | 151   | 33 | 7  |
| <i>Xanthomonas campestris</i>          | <i>Xanthomonas</i>       | Xanthomonadaceae     | 164   | 32 | 24 |
| <i>Exiguobacterium</i> sp. AT1b        | <i>Exiguobacterium</i>   |                      | 271   | 32 | 0  |
| <i>Pseudomonas pseudoalcaligenes</i>   | <i>Pseudomonas</i>       | Pseudomonadaceae     | 932   | 32 | 0  |
| <i>Streptococcus pasteurianus</i>      | <i>Streptococcus</i>     | Streptococcaceae     | 0     | 27 | 0  |
| <i>Rothia dentocariosa</i>             | <i>Rothia</i>            | Micrococcaceae       | 270   | 25 | 2  |
| *                                      | *                        | Streptococcaceae     | 0     | 25 | 0  |
| <i>Delftia acidovorans</i>             | <i>Delftia</i>           | Comamonadaceae       | 28    | 25 | 0  |
| *                                      | <i>Propionibacterium</i> | Propionibacteriaceae | 773   | 23 | 8  |
| <i>Acinetobacter baumannii</i>         | <i>Acinetobacter</i>     | Moraxellaceae        | 853   | 23 | 5  |
| <i>Streptococcus parasanguinis</i>     | <i>Streptococcus</i>     | Streptococcaceae     | 393   | 23 | 2  |
| <i>Pseudomonas</i> sp. WCS374          | <i>Pseudomonas</i>       | Pseudomonadaceae     | 15    | 22 | 1  |
| <i>Enterobacter aerogenes</i>          | <i>Enterobacter</i>      | Enterobacteriaceae   | 0     | 22 | 0  |
| <i>Stenotrophomonas maltophilia</i>    | <i>Stenotrophomonas</i>  | Xanthomonadaceae     | 78    | 22 | 0  |
| <i>Alicyclobacillus acidocaldarius</i> | <i>Alicyclobacillus</i>  | Alicyclobacillaceae  | 79    | 21 | 2  |
| <i>Haemophilus influenzae</i>          | <i>Haemophilus</i>       | Pasteurellaceae      | 145   | 19 | 13 |
| <i>Rothia mucilaginosa</i>             | <i>Rothia</i>            | Micrococcaceae       | 379   | 19 | 3  |
| <i>Staphylococcus xylosus</i>          | <i>Staphylococcus</i>    | Staphylococcaceae    | 68    | 18 | 3  |
| <i>Acidovorax</i> sp. JS42             | <i>Acidovorax</i>        | Comamonadaceae       | 92    | 18 | 3  |
| *                                      | <i>Rahnella</i>          | Enterobacteriaceae   | 0     | 18 | 0  |
| <i>Streptococcus pseudopneumoniae</i>  | <i>Streptococcus</i>     | Streptococcaceae     | 30    | 18 | 0  |
| <i>Streptococcus thermophilus</i>      | <i>Streptococcus</i>     | Streptococcaceae     | 114   | 17 | 4  |

|                                            |                              |                        |       |    |   |
|--------------------------------------------|------------------------------|------------------------|-------|----|---|
| <i>Pseudomonas aeruginosa</i>              | <i>Pseudomonas</i>           | Pseudomonadaceae       | 114   | 17 | 1 |
| <i>Corynebacterium kroppenstedtii</i>      | <i>Corynebacterium</i>       | Corynebacteriaceae     | 0     | 16 | 0 |
| <i>Staphylococcus haemolyticus</i>         | <i>Staphylococcus</i>        | Staphylococcaceae      | 1,320 | 16 | 0 |
| <i>Serratia</i> sp. SCBI                   | <i>Serratia</i>              | Enterobacteriaceae     | 0     | 15 | 0 |
| *                                          | <i>Enterococcus</i>          | Enterococcaceae        | 123   | 14 | 5 |
| <i>Staphylococcus warneri</i>              | <i>Staphylococcus</i>        | Staphylococcaceae      | 326   | 14 | 3 |
| <i>Burkholderia cepacia</i>                | <i>Burkholderia</i>          | Burkholderiaceae       | 63    | 13 | 9 |
| *                                          | <i>Corynebacterium</i>       | Corynebacteriaceae     | 167   | 13 | 7 |
| <i>Comamonas testosteroni</i>              | <i>Comamonas</i>             | Comamonadaceae         | 175   | 13 | 1 |
| <i>Bifidobacterium thermophilum</i>        | <i>Bifidobacterium</i>       | Bifidobacteriaceae     | 0     | 13 | 0 |
| *                                          | <i>Lactobacillus</i>         | Lactobacillaceae       | 50    | 13 | 0 |
| <i>Thermoanaerobacterium xylanolyticum</i> | <i>Thermoanaerobacterium</i> | Thermoanaerobacterales | 56    | 13 | 0 |
| <i>Ralstonia pickettii</i>                 | <i>Ralstonia</i>             | Burkholderiaceae       | 147   | 13 | 0 |
| <i>Meiothermus ruber</i>                   | <i>Meiothermus</i>           | Thermaceae             | 540   | 13 | 0 |
| <i>Acidovorax ebreus</i>                   | <i>Acidovorax</i>            | Comamonadaceae         | 10    | 12 | 0 |
| <i>Micrococcus</i> sp. V7                  | <i>Micrococcus</i>           | Micrococcaceae         | 36    | 12 | 0 |
| <i>Leuconostoc mesenteroides</i>           | <i>Leuconostoc</i>           | Leuconostocaceae       | 335   | 11 | 1 |
| <i>Bacillus halodurans</i>                 | <i>Bacillus</i>              | Bacillaceae            | 9     | 11 | 0 |
| <i>Corynebacterium variabile</i>           | <i>Corynebacterium</i>       | Corynebacteriaceae     | 20    | 11 | 0 |
| *                                          | <i>Acidovorax</i>            | Comamonadaceae         | 48    | 11 | 0 |
| <i>Bifidobacterium bifidum</i>             | <i>Bifidobacterium</i>       | Bifidobacteriaceae     | 619   | 11 | 0 |
| <i>Rhizobium</i> sp. IRBG74                | <i>Rhizobium</i>             | Rhizobiaceae           | 182   | 10 | 4 |
| *                                          | <i>Acinetobacter</i>         | Moraxellaceae          | 569   | 10 | 1 |
| <i>Acinetobacter calcoaceticus</i>         | <i>Acinetobacter</i>         | Moraxellaceae          | 0     | 10 | 0 |
| <i>Chroococcidiopsis thermalis</i>         | <i>Chroococcidiopsis</i>     |                        | 28    | 10 | 0 |
| <i>Streptococcus sanguinis</i>             | <i>Streptococcus</i>         | Streptococcaceae       | 47    | 10 | 0 |
| <i>Acidovorax</i> sp. KKS102               | <i>Acidovorax</i>            | Comamonadaceae         | 74    | 10 | 0 |
| <i>Raoultella ornithinolytica</i>          | <i>Raoultella</i>            | Enterobacteriaceae     | 94    | 10 | 0 |
| <i>Ochrobactrum anthropi</i>               | <i>Ochrobactrum</i>          | Brucellaceae           | 270   | 10 | 0 |
| <i>Lactobacillus johnsonii</i>             | <i>Lactobacillus</i>         | Lactobacillaceae       | 9     | 9  | 2 |
| <i>Methylobacterium populi</i>             | <i>Methylobacterium</i>      | Methylobacteriaceae    | 30    | 9  | 3 |
| <i>Rhodococcus equi</i>                    | <i>Rhodococcus</i>           | Nocardiaceae           | 62    | 9  | 4 |
| <i>Lactobacillus helveticus</i>            | <i>Lactobacillus</i>         | Lactobacillaceae       | 4     | 9  | 0 |
| *                                          | <i>Serratia</i>              | Enterobacteriaceae     | 30    | 9  | 0 |
| <i>Burkholderia cenocepacia</i>            | <i>Burkholderia</i>          | Burkholderiaceae       | 15    | 8  | 1 |
| *                                          | <i>Staphylococcus</i>        | Staphylococcaceae      | 1,001 | 8  | 6 |
| <i>Enterobacter</i> sp. R4-368             | <i>Enterobacter</i>          | Enterobacteriaceae     | 0     | 8  | 0 |
| <i>Propionibacterium propionicum</i>       | <i>Propionibacterium</i>     | Propionibacteriaceae   | 31    | 8  | 0 |

|                                         |                              |                        |       |   |   |
|-----------------------------------------|------------------------------|------------------------|-------|---|---|
| <i>Streptococcus gordonii</i>           | <i>Streptococcus</i>         | Streptococcaceae       | 35    | 8 | 0 |
| <i>Corynebacterium singulare</i>        | <i>Corynebacterium</i>       | Corynebacteriaceae     | 48    | 8 | 0 |
| <i>Burkholderia ambifaria</i>           | <i>Burkholderia</i>          | Burkholderiaceae       | 0     | 7 | 1 |
| *                                       | <i>Micrococcus</i>           | Micrococcaceae         | 142   | 7 | 2 |
| <i>Fervidobacterium nodosum</i>         | <i>Fervidobacterium</i>      | Thermotogaceae         | 83    | 7 | 1 |
| <i>Aeromonas media</i>                  | <i>Aeromonas</i>             | Aeromonadaceae         | 433   | 7 | 3 |
| <i>Cronobacter sakazakii</i>            | <i>Cronobacter</i>           | Enterobacteriaceae     | 0     | 7 | 0 |
| <i>Myroides profundus</i>               | <i>Myroides</i>              | Flavobacteriaceae      | 0     | 7 | 0 |
| <i>Methylobacterium oryzae</i>          | <i>Methylobacterium</i>      | Methylobacteriaceae    | 0     | 7 | 0 |
| *                                       | <i>Xanthomonas</i>           | Xanthomonadaceae       | 13    | 7 | 0 |
| <i>Thermoanaerobacterium saccharo</i>   | <i>Thermoanaerobacterium</i> | Thermoanaerobacterales | 73    | 7 | 0 |
| <i>Pseudomonas mendocina</i>            | <i>Pseudomonas</i>           | Pseudomonadaceae       | 84    | 7 | 0 |
| <i>Corynebacterium ureicelerivorans</i> | <i>Corynebacterium</i>       | Corynebacteriaceae     | 315   | 7 | 0 |
| <i>Lactobacillus crispatus</i>          | <i>Lactobacillus</i>         | Lactobacillaceae       | 74    | 6 | 3 |
| <i>Alicyclophilus denitrificans</i>     | <i>Alicyclophilus</i>        | Comamonadaceae         | 132   | 6 | 2 |
| <i>Gardnerella vaginalis</i>            | <i>Gardnerella</i>           | Bifidobacteriaceae     | 1,140 | 6 | 2 |
| *                                       | <i>Gemella</i>               |                        | 0     | 6 | 0 |
| *                                       | <i>Ralstonia</i>             | Burkholderiaceae       | 0     | 6 | 0 |
| <i>Eggerthella lenta</i>                | <i>Eggerthella</i>           | Coriobacteriaceae      | 3     | 6 | 0 |
| *                                       | *                            | Rhizobiaceae           | 7     | 6 | 0 |
| <i>Prevotella denticola</i>             | <i>Prevotella</i>            | Prevotellaceae         | 16    | 6 | 0 |
| <i>Prevotella intermedia</i>            | <i>Prevotella</i>            | Prevotellaceae         | 18    | 6 | 0 |
| <i>Psychrobacter sp. PRwf-1</i>         | <i>Psychrobacter</i>         | Moraxellaceae          | 31    | 6 | 0 |
| <i>Azospira oryzae</i>                  | <i>Azospira</i>              | Rhodocyclaceae         | 38    | 6 | 0 |
| <i>Acinetobacter haemolyticus</i>       | <i>Acinetobacter</i>         | Moraxellaceae          | 47    | 6 | 0 |
| *                                       | <i>Delftia</i>               | Comamonadaceae         | 54    | 6 | 0 |
| <i>Burkholderia contaminans</i>         | <i>Burkholderia</i>          | Burkholderiaceae       | 7     | 5 | 4 |
| <i>Arthrobacter arilaitensis</i>        | <i>Arthrobacter</i>          | Micrococcaceae         | 20    | 5 | 7 |
| <i>Dermacoccus nishinomiyaensis</i>     | <i>Dermacoccus</i>           | Dermacoccaceae         | 31    | 5 | 6 |
| <i>Pantoea ananatis</i>                 | <i>Pantoea</i>               | Enterobacteriaceae     | 40    | 5 | 5 |
| <i>Staphylococcus saprophyticus</i>     | <i>Staphylococcus</i>        | Staphylococcaceae      | 148   | 5 | 8 |
| <i>Staphylococcus pasteurii</i>         | <i>Staphylococcus</i>        | Staphylococcaceae      | 69    | 5 | 1 |
| <i>Rahnella aquatilis</i>               | <i>Rahnella</i>              | Enterobacteriaceae     | 0     | 5 | 0 |
| <i>Rahnella sp. Y9602</i>               | <i>Rahnella</i>              | Enterobacteriaceae     | 0     | 5 | 0 |
| <i>Campylobacter concisus</i>           | <i>Campylobacter</i>         | Campylobacteraceae     | 0     | 5 | 0 |
| <i>Geobacillus sp. WCH70</i>            | <i>Geobacillus</i>           | Bacillaceae            | 0     | 5 | 0 |
| *                                       | <i>Frankia</i>               | Frankiaceae            | 0     | 5 | 0 |
| <i>Lactobacillus casei</i>              | <i>Lactobacillus</i>         | Lactobacillaceae       | 0     | 5 | 0 |

|                                  |                   |                        |     |   |   |
|----------------------------------|-------------------|------------------------|-----|---|---|
| Thiomonas intermedia             | Thiomonas         |                        | 0   | 5 | 0 |
| Streptococcus gallolyticus       | Streptococcus     | Streptococcaceae       | 5   | 5 | 0 |
| Thioalkalivibrio sulfidiphilus   | Thioalkalivibrio  | Ectothiorhodospiraceae | 10  | 5 | 0 |
| *                                | Bradyrhizobium    | Bradyrhizobiaceae      | 13  | 5 | 0 |
| Bifidobacterium longum           | Bifidobacterium   | Bifidobacteriaceae     | 27  | 5 | 0 |
| Corynebacterium falsenii         | Corynebacterium   | Corynebacteriaceae     | 32  | 5 | 0 |
| Delftia sp. Cs1-4                | Delftia           | Comamonadaceae         | 40  | 5 | 0 |
| Acinetobacter sp. M131           | Acinetobacter     | Moraxellaceae          | 79  | 5 | 0 |
| Prevotella melaninogenica        | Prevotella        | Prevotellaceae         | 151 | 5 | 0 |
| *                                | *                 | Comamonadaceae         | 217 | 5 | 0 |
| Leuconostoc carnosum             | Leuconostoc       | Leuconostocaceae       | 13  | 4 | 1 |
| Pectobacterium carotovorum       | Pectobacterium    | Enterobacteriaceae     | 74  | 4 | 3 |
| *                                | Myroides          | Flavobacteriaceae      | 0   | 4 | 0 |
| *                                | Erwinia           | Enterobacteriaceae     | 0   | 4 | 0 |
| Gordonia sp. KTR9                | Gordonia          | Gordoniaceae           | 0   | 4 | 0 |
| Paenibacillus sp. FSL R7-0273    | Paenibacillus     | Paenibacillaceae       | 0   | 4 | 0 |
| Paracoccus sp. N81106            | Paracoccus        | Rhodobacteraceae       | 0   | 4 | 0 |
| Sphingobium fuliginis            | Sphingobium       | Sphingomonadaceae      | 0   | 4 | 0 |
| *                                | *                 |                        | 1   | 4 | 0 |
| *                                | Geobacillus       | Bacillaceae            | 10  | 4 | 0 |
| Pseudomonas sp. VLB120           | Pseudomonas       | Pseudomonadaceae       | 11  | 4 | 0 |
| Pelagibacterium halotolerans     | Pelagibacterium   | Hyphomicrobiaceae      | 22  | 4 | 0 |
| Streptococcus intermedius        | Streptococcus     | Streptococcaceae       | 34  | 4 | 0 |
| Propionibacterium freudenreichii | Propionibacterium | Propionibacteriaceae   | 45  | 4 | 0 |
| *                                | Enterobacter      | Enterobacteriaceae     | 72  | 4 | 0 |
| Nakamurella multipartita         | Nakamurella       | Nakamurellaceae        | 32  | 3 | 7 |
| Haemophilus parasuis             | Haemophilus       | Pasteurellaceae        | 0   | 3 | 0 |
| Fusobacterium nucleatum          | Fusobacterium     | Fusobacteriaceae       | 0   | 3 | 0 |
| Citrobacter freundii             | Citrobacter       | Enterobacteriaceae     | 1   | 3 | 0 |
| Ruminococcus sp. SR1/5           | Ruminococcus      | Ruminococcaceae        | 9   | 3 | 0 |
| Pseudoxanthomonas spadix         | Pseudoxanthomonas | Xanthomonadaceae       | 10  | 3 | 0 |
| Lactococcus garvieae             | Lactococcus       | Streptococcaceae       | 15  | 3 | 0 |
| Neisseria elongata               | Neisseria         | Neisseriaceae          | 18  | 3 | 0 |
| Acidovorax citrulli              | Acidovorax        | Comamonadaceae         | 19  | 3 | 0 |
| Novosphingobium pentaromativora  | Novosphingobium   | Sphingomonadaceae      | 20  | 3 | 0 |
| Citrobacter koseri               | Citrobacter       | Enterobacteriaceae     | 26  | 3 | 0 |
| Methylobacterium aquaticum       | Methylobacterium  | Methylobacteriaceae    | 32  | 3 | 0 |
| Pseudomonas denitrificans        | Pseudomonas       | Pseudomonadaceae       | 34  | 3 | 0 |

|                                     |                   |                        |     |   |   |
|-------------------------------------|-------------------|------------------------|-----|---|---|
| Rhodococcus erythropolis            | Rhodococcus       | Nocardiaceae           | 36  | 3 | 0 |
| Lactobacillus reuteri               | Lactobacillus     | Lactobacillaceae       | 48  | 3 | 0 |
| Bacteroides fragilis                | Bacteroides       | Bacteroidaceae         | 70  | 3 | 0 |
| Lactobacillus plantarum             | Lactobacillus     | Lactobacillaceae       | 137 | 3 | 0 |
| *                                   | Bacillus          | Bacillaceae            | 196 | 3 | 0 |
| Pseudomonas rhizosphaerae           | Pseudomonas       | Pseudomonadaceae       | 0   | 2 | 1 |
| Achromobacter xylosoxidans          | Achromobacter     | Alcaligenaceae         | 41  | 2 | 1 |
| Lactobacillus amylovorus            | Lactobacillus     | Lactobacillaceae       | 0   | 2 | 0 |
| Propionibacterium acidipropionici   | Propionibacterium | Propionibacteriaceae   | 0   | 2 | 0 |
| Leuconostoc gelidum                 | Leuconostoc       | Leuconostocaceae       | 0   | 2 | 0 |
| Weissella thailandensis             | Weissella         | Leuconostocaceae       | 0   | 2 | 0 |
| Pandoraea sp. RB-44                 | Pandoraea         | Burkholderiaceae       | 0   | 2 | 0 |
| Escherichia vulneris                | Escherichia       | Enterobacteriaceae     | 0   | 2 | 0 |
| Yersinia intermedia                 | Yersinia          | Enterobacteriaceae     | 0   | 2 | 0 |
| Flavobacteriaceae bacterium 3519-10 |                   | Flavobacteriaceae      | 0   | 2 | 0 |
| *                                   | Rhodococcus       | Nocardiaceae           | 0   | 2 | 0 |
| Streptococcus sp. (N1)              | Streptococcus     | Streptococcaceae       | 0   | 2 | 0 |
| *                                   | Methylobacterium  | Methylobacteriaceae    | 8   | 2 | 0 |
| Sphingomonas sp. MM-1               | Sphingomonas      | Sphingomonadaceae      | 9   | 2 | 0 |
| Rhizobium etli                      | Rhizobium         | Rhizobiaceae           | 18  | 2 | 0 |
| *                                   | Agrobacterium     | Rhizobiaceae           | 41  | 2 | 0 |
| Thermus scotoductus                 | Thermus           | Thermaceae             | 53  | 2 | 0 |
| Methylobacterium extorquens         | Methylobacterium  | Methylobacteriaceae    | 60  | 2 | 0 |
| Streptococcus sp. I-P16             | Streptococcus     | Streptococcaceae       | 63  | 2 | 0 |
| Pantoea sp. PSNIH1                  | Pantoea           | Enterobacteriaceae     | 76  | 2 | 0 |
| Methylobacterium radiotolerans      | Methylobacterium  | Methylobacteriaceae    | 96  | 2 | 0 |
| [Ruminococcus] torques              | Blautia           | Lachnospiraceae        | 0   | 1 | 7 |
| Lactobacillus sakei                 | Lactobacillus     | Lactobacillaceae       | 0   | 1 | 2 |
| *                                   | *                 | Rhodocyclaceae         | 0   | 1 | 1 |
| Bacillus licheniformis              | Bacillus          | Bacillaceae            | 34  | 1 | 5 |
| Corynebacterium accolens            | Corynebacterium   | Corynebacteriaceae     | 0   | 1 | 0 |
| Corynebacterium sp. ATCC 6931       | Corynebacterium   | Corynebacteriaceae     | 0   | 1 | 0 |
| Serratia symbiotica                 | Serratia          | Enterobacteriaceae     | 0   | 1 | 0 |
| Lactobacillus delbrueckii           | Lactobacillus     | Lactobacillaceae       | 0   | 1 | 0 |
| Bacillus sp. YP1                    | Bacillus          | Bacillaceae            | 0   | 1 | 0 |
| Klebsiella sp. PG122E               | Klebsiella        | Enterobacteriaceae     | 0   | 1 | 0 |
| *                                   | Rathayibacter     | Microbacteriaceae      | 0   | 1 | 0 |
| Pseudoalteromonas sp. P30           | Pseudoalteromonas | Pseudoalteromonadaceae | 0   | 1 | 0 |

|                                 |                   |                       |     |   |    |
|---------------------------------|-------------------|-----------------------|-----|---|----|
| Staphylococcus sp. CDC25        | Staphylococcus    | Staphylococcaceae     | 0   | 1 | 0  |
| Corynebacterium resistens       | Corynebacterium   | Corynebacteriaceae    | 1   | 1 | 0  |
| Shigella dysenteriae            | Shigella          | Enterobacteriaceae    | 9   | 1 | 0  |
| *                               | *                 | Xanthomonadaceae      | 11  | 1 | 0  |
| Agrobacterium fabrum            | Agrobacterium     | Rhizobiaceae          | 19  | 1 | 0  |
| Gordonia polyisoprenivorans     | Gordonia          | Gordoniaceae          | 22  | 1 | 0  |
| Pseudomonas balearica           | Pseudomonas       | Pseudomonadaceae      | 25  | 1 | 0  |
| *                               | *                 | Pseudomonadaceae      | 25  | 1 | 0  |
| Ruminococcus bromii             | Ruminococcus      | Ruminococcaceae       | 29  | 1 | 0  |
| Brachybacterium faecium         | Brachybacterium   | Dermabacteraceae      | 31  | 1 | 0  |
| Acinetobacter johnsonii         | Acinetobacter     | Moraxellaceae         | 37  | 1 | 0  |
| Micrococcus sp. A1              | Micrococcus       | Micrococcaceae        | 95  | 1 | 0  |
| Filifactor alocis               | Filifactor        | Peptostreptococcaceae | 132 | 1 | 0  |
| Pantoea vagans                  | Pantoea           | Enterobacteriaceae    | 162 | 1 | 0  |
| Haemophilus parainfluenzae      | Haemophilus       | Pasteurellaceae       | 241 | 1 | 0  |
| Pantoea rwandensis              | Pantoea           | Enterobacteriaceae    | 0   | 0 | 5  |
| Corynebacterium vitaeruminis    | Corynebacterium   | Corynebacteriaceae    | 0   | 0 | 4  |
| Pseudomonas poae                | Pseudomonas       | Pseudomonadaceae      | 8   | 0 | 3  |
| *                               | *                 | Brucellaceae          | 0   | 0 | 2  |
| Lactobacillus fermentum         | Lactobacillus     | Lactobacillaceae      | 0   | 0 | 2  |
| Anabaena variabilis             | Anabaena          | Nostocaceae           | 0   | 0 | 2  |
| Sphingobacterium sp. ML3W       | Sphingobacterium  | Sphingobacteriaceae   | 0   | 0 | 2  |
| sugarcane isolate 74-1          |                   |                       | 0   | 0 | 2  |
| *                               | *                 | Geodermatophilaceae   | 1   | 0 | 2  |
| Megasphaera elsdenii            | Megasphaera       | Veillonellaceae       | 0   | 0 | 1  |
| Pseudoxanthomonas suwonensis    | Pseudoxanthomonas | Xanthomonadaceae      | 7   | 0 | 1  |
| Corynebacterium glutamicum      | Corynebacterium   | Corynebacteriaceae    | 157 | 0 | 17 |
| Sphingomonas taxi               | Sphingomonas      | Sphingomonadaceae     | 19  | 0 | 2  |
| Pseudomonas graminis            | Pseudomonas       | Pseudomonadaceae      | 12  | 0 | 1  |
| Bradyrhizobium sp. BTAi1        | Bradyrhizobium    | Bradyrhizobiaceae     | 21  | 0 | 1  |
| Enterococcus hirae              | Enterococcus      | Enterococcaceae       | 25  | 0 | 1  |
| Corynebacterium sp. L2-79-05    | Corynebacterium   | Corynebacteriaceae    | 34  | 0 | 1  |
| Arthrobacter phenanthrenivorans | Arthrobacter      | Micrococcaceae        | 36  | 0 | 1  |
| Corynebacterium maris           | Corynebacterium   | Corynebacteriaceae    | 87  | 0 | 1  |
| Gordonia bronchialis            | Gordonia          | Gordoniaceae          | 90  | 0 | 1  |
| Kytococcus sedentarius          | Kytococcus        | Dermacoccaceae        | 130 | 0 | 1  |
| Kosakonia cowanii               | Kosakonia         | Enterobacteriaceae    | 1   | 0 | 0  |
| Xenorhabdus bovienii            | Xenorhabdus       | Enterobacteriaceae    | 1   | 0 | 0  |

|                                              |                   |                       |   |   |   |
|----------------------------------------------|-------------------|-----------------------|---|---|---|
| Paracoccus haeundaensis                      | Paracoccus        | Rhodobacteraceae      | 1 | 0 | 0 |
| Methylobacterium sp. 238                     | Methylobacterium  | Methylobacteriaceae   | 1 | 0 | 0 |
| Acinetobacter sp. BW3                        | Acinetobacter     | Moraxellaceae         | 1 | 0 | 0 |
| Aeromonas sobria                             | Aeromonas         | Aeromonadaceae        | 1 | 0 | 0 |
| Bacillus lehensis                            | Bacillus          | Bacillaceae           | 1 | 0 | 0 |
| Ralstonia solanacearum                       | Ralstonia         | Burkholderiaceae      | 1 | 0 | 0 |
| Citrobacter sp. FPO3                         | Citrobacter       | Enterobacteriaceae    | 1 | 0 | 0 |
| Citrobacter sp. I91-3                        | Citrobacter       | Enterobacteriaceae    | 1 | 0 | 0 |
| Erwinia amylovora                            | Erwinia           | Enterobacteriaceae    | 1 | 0 | 0 |
| Klebsiella milletis                          | Klebsiella        | Enterobacteriaceae    | 1 | 0 | 0 |
| Salmonella bongori                           | Salmonella        | Enterobacteriaceae    | 1 | 0 | 0 |
| Serratia grimesii                            | Serratia          | Enterobacteriaceae    | 1 | 0 | 0 |
| Yersinia pestis                              | Yersinia          | Enterobacteriaceae    | 1 | 0 | 0 |
| *                                            |                   | Enterobacteriaceae    | 1 | 0 | 0 |
| Lactobacillus brevis                         | Lactobacillus     | Lactobacillaceae      | 1 | 0 | 0 |
| Kocuria sp. starX                            | Kocuria           | Micrococcaceae        | 1 | 0 | 0 |
| Acinetobacter sp. 26                         | Acinetobacter     | Moraxellaceae         | 1 | 0 | 0 |
| Peptoclostridium difficile                   | Peptoclostridium  | Peptostreptococcaceae | 1 | 0 | 0 |
| Sorangium cellulosum                         | Sorangium         | Polyangiaceae         | 1 | 0 | 0 |
| Pseudomonas sp. NSi14                        | Pseudomonas       | Pseudomonadaceae      | 1 | 0 | 0 |
| Synergistetes oral clone 03 5 D05            |                   |                       | 1 | 0 | 0 |
| bacterium EBAD26                             |                   |                       | 1 | 0 | 0 |
| bacterium NLAE-zl-G351                       |                   |                       | 1 | 0 | 0 |
| rumen bacterium enrichment culture clone Y74 |                   |                       | 1 | 0 | 0 |
| unidentified marine bacterioplankton         |                   |                       | 2 | 0 | 0 |
| Escherichia albertii                         | Escherichia       | Enterobacteriaceae    | 2 | 0 | 0 |
| Mobiluncus curtisii                          | Mobiluncus        | Actinomycetaceae      | 2 | 0 | 0 |
| *                                            | Caulobacter       | Caulobacteraceae      | 2 | 0 | 0 |
| Methylotenera versatilis                     | Methylotenera     | Methylophilaceae      | 2 | 0 | 0 |
| Propionibacterium sp. KPL1849                | Propionibacterium | Propionibacteriaceae  | 3 | 0 | 0 |
| bacterium EBAD25                             |                   |                       | 3 | 0 | 0 |
| Bacillus sp. Pc3                             | Bacillus          | Bacillaceae           | 3 | 0 | 0 |
| Acinetobacter sp. EVA14                      | Acinetobacter     | Moraxellaceae         | 3 | 0 | 0 |
| Agrobacterium sp.                            | Agrobacterium     | Rhizobiaceae          | 3 | 0 | 0 |
| Alistipes shahii                             | Alistipes         | Rikenellaceae         | 3 | 0 | 0 |
| *                                            | Thermus           | Thermaceae            | 3 | 0 | 0 |
| *                                            | Methylibium       |                       | 3 | 0 | 0 |
| butyrate-producing bacterium SSC/2           |                   |                       | 3 | 0 | 0 |



|                                           |                          |                        |   |   |   |
|-------------------------------------------|--------------------------|------------------------|---|---|---|
| <i>Escherichia fergusonii</i>             | <i>Escherichia</i>       | Enterobacteriaceae     | 4 | 0 | 0 |
| <i>Enterobacter</i> sp. Ni15              | <i>Enterobacter</i>      | Enterobacteriaceae     | 4 | 0 | 0 |
| <i>Capnocytophaga ochracea</i>            | <i>Capnocytophaga</i>    | Flavobacteriaceae      | 4 | 0 | 0 |
| <i>Thauera</i> sp. 6NLG                   | <i>Thauera</i>           | Rhodocyclaceae         | 4 | 0 | 0 |
| <i>Desulfovibrio alaskensis</i>           | <i>Desulfovibrio</i>     | Desulfovibrionaceae    | 4 | 0 | 0 |
| <i>Variovorax</i> sp. Alb14               | <i>Variovorax</i>        | Comamonadaceae         | 4 | 0 | 0 |
| *                                         | <i>Shigella</i>          | Enterobacteriaceae     | 4 | 0 | 0 |
| *                                         | *                        | Micromonosporaceae     | 4 | 0 | 0 |
| *                                         | <i>Micromonospora</i>    | Micromonosporaceae     | 4 | 0 | 0 |
| <i>Thermobifida fusca</i>                 | <i>Thermobifida</i>      | Nocardiopsaceae        | 4 | 0 | 0 |
| <i>Turneriella parva</i>                  | <i>Turneriella</i>       | Leptospiraceae         | 5 | 0 | 0 |
| [ <i>Clostridium</i> ] <i>sticklandii</i> | <i>Peptoclostridium</i>  | Peptostreptococcaceae  | 5 | 0 | 0 |
| <i>Acinetobacter</i> sp. Ooi24            | <i>Acinetobacter</i>     | Moraxellaceae          | 5 | 0 | 0 |
| <i>Ochrobactrum</i> sp. SJY1              | <i>Ochrobactrum</i>      | Brucellaceae           | 5 | 0 | 0 |
| <i>Carnobacterium</i> sp. WN1359          | <i>Carnobacterium</i>    | Carnobacteriaceae      | 5 | 0 | 0 |
| <i>Iamia majanohamensis</i>               | <i>Iamia</i>             | Iamiaceae              | 5 | 0 | 0 |
| <i>Saccharomonospora viridis</i>          | <i>Saccharomonospora</i> | Pseudonocardiaceae     | 5 | 0 | 0 |
| <i>Rhizobium</i> sp.                      | <i>Rhizobium</i>         | Rhizobiaceae           | 5 | 0 | 0 |
| <i>Staphylococcus</i> sp. CDC3            | <i>Staphylococcus</i>    | Staphylococcaceae      | 5 | 0 | 0 |
| <i>Shigella sonnei</i>                    | <i>Shigella</i>          | Enterobacteriaceae     | 6 | 0 | 0 |
| <i>Pseudomonas syringae</i>               | <i>Pseudomonas</i>       | Pseudomonadaceae       | 6 | 0 | 0 |
| <i>Burkholderia vietnamiensis</i>         | <i>Burkholderia</i>      | Burkholderiaceae       | 6 | 0 | 0 |
| <i>Shigella boydii</i>                    | <i>Shigella</i>          | Enterobacteriaceae     | 6 | 0 | 0 |
| <i>Bacillus weihenstephanensis</i>        | <i>Bacillus</i>          | Bacillaceae            | 6 | 0 | 0 |
| <i>Erythrobacter litoralis</i>            | <i>Erythrobacter</i>     | Erythrobacteraceae     | 6 | 0 | 0 |
| <i>Pseudoalteromonas haloplanktis</i>     | <i>Pseudoalteromonas</i> | Pseudoalteromonadaceae | 6 | 0 | 0 |
| <i>Pseudomonas</i> sp. FG182              | <i>Pseudomonas</i>       | Pseudomonadaceae       | 6 | 0 | 0 |
| *                                         | <i>Rhizobium</i>         | Rhizobiaceae           | 6 | 0 | 0 |
| *                                         | <i>Rickettsia</i>        | Rickettsiaceae         | 6 | 0 | 0 |
| <i>Sphingobium yanoikuyae</i>             | <i>Sphingobium</i>       | Sphingomonadaceae      | 6 | 0 | 0 |
| <i>Stenotrophomonas rhizophila</i>        | <i>Stenotrophomonas</i>  | Xanthomonadaceae       | 6 | 0 | 0 |
| *                                         | <i>Leuconostoc</i>       | Leuconostocaceae       | 7 | 0 | 0 |
| <i>Aquicola tertiaricarbonis</i>          | <i>Aquicola</i>          |                        | 7 | 0 | 0 |
| <i>Nocardiopsis dassonvillei</i>          | <i>Nocardiopsis</i>      | Nocardiopsaceae        | 7 | 0 | 0 |
| <i>Carnobacterium maltaromaticum</i>      | <i>Carnobacterium</i>    | Carnobacteriaceae      | 7 | 0 | 0 |
| *                                         | <i>Haemophilus</i>       | Pasteurellaceae        | 7 | 0 | 0 |
| <i>Bordetella parapertussis</i>           | <i>Bordetella</i>        | Alcaligenaceae         | 7 | 0 | 0 |
| *                                         | <i>Dietzia</i>           | Dietziaceae            | 7 | 0 | 0 |

|                                     |                      |                    |    |   |   |
|-------------------------------------|----------------------|--------------------|----|---|---|
| Shewanella sp. W3-18-1              | Shewanella           | Shewanellaceae     | 7  | 0 | 0 |
| Sphingomonas sp. NP5                | Sphingomonas         | Sphingomonadaceae  | 7  | 0 | 0 |
| Staphylococcus gallinarum           | Staphylococcus       | Staphylococcaceae  | 7  | 0 | 0 |
| Micavibrio aeruginosavorus          | Micavibrio           |                    | 7  | 0 | 0 |
| Paracoccus denitrificans            | Paracoccus           | Rhodobacteraceae   | 8  | 0 | 0 |
| [Cellvibrio] gilvus                 | Cellulomonas         | Cellulomonadaceae  | 8  | 0 | 0 |
| Corynebacterium jeikeium            | Corynebacterium      | Corynebacteriaceae | 8  | 0 | 0 |
| *                                   | *                    | Staphylococcaceae  | 8  | 0 | 0 |
| Meiothermus silvanus                | Meiothermus          | Thermaceae         | 8  | 0 | 0 |
| Asticcacaulis excentricus           | Asticcacaulis        | Caulobacteraceae   | 8  | 0 | 0 |
| *                                   | Atopobium            | Coriobacteriaceae  | 8  | 0 | 0 |
| Streptococcus constellatus          | Streptococcus        | Streptococcaceae   | 8  | 0 | 0 |
| Microcystis aeruginosa              | Microcystis          |                    | 8  | 0 | 0 |
| agricultural soil bacterium SC-I-13 |                      |                    | 8  | 0 | 0 |
| [Ruminococcus] obeum                | Blautia              | Lachnospiraceae    | 9  | 0 | 0 |
| Thermus thermophilus                | Thermus              | Thermaceae         | 9  | 0 | 0 |
| Shigella flexneri                   | Shigella             | Enterobacteriaceae | 9  | 0 | 0 |
| *                                   | Mycobacterium        | Mycobacteriaceae   | 9  | 0 | 0 |
| Pseudomonas savastanoi              | Pseudomonas          | Pseudomonadaceae   | 9  | 0 | 0 |
| Staphylococcus capitis              | Staphylococcus       | Staphylococcaceae  | 9  | 0 | 0 |
| *                                   | Cupriavidus          | Burkholderiaceae   | 9  | 0 | 0 |
| Dyadobacter fermentans              | Dyadobacter          | Cytophagaceae      | 9  | 0 | 0 |
| Dietzia sp. CQ4                     | Dietzia              | Dietziaceae        | 9  | 0 | 0 |
| *                                   | *                    | Methylophilaceae   | 9  | 0 | 0 |
| *                                   | Neisseria            | Neisseriaceae      | 9  | 0 | 0 |
| Corynebacterium aurimucosum         | Corynebacterium      | Corynebacteriaceae | 10 | 0 | 0 |
| *                                   |                      |                    | 10 | 0 | 0 |
| Pseudomonas fulva                   | Pseudomonas          | Pseudomonadaceae   | 10 | 0 | 0 |
| Chromohalobacter salexigens         | Chromohalobacter     | Halomonadaceae     | 10 | 0 | 0 |
| Brevundimonas diminuta              | Brevundimonas        | Caulobacteraceae   | 10 | 0 | 0 |
| Streptococcus lutetiensis           | Streptococcus        | Streptococcaceae   | 10 | 0 | 0 |
| Bordetella petrii                   | Bordetella           | Alcaligenaceae     | 10 | 0 | 0 |
| Erythrobacter sp. JP13.1            | Erythrobacter        | Erythrobacteraceae | 10 | 0 | 0 |
| Methylobacillus glycogenes          | Methylobacillus      | Methylophilaceae   | 10 | 0 | 0 |
| Candidatus Rhodoluna ladicola       | Candidatus Rhodoluna | Microbacteriaceae  | 10 | 0 | 0 |
| Arthrobacter sp. JBH1               | Arthrobacter         | Micrococcaceae     | 10 | 0 | 0 |
| Aggregatibacter aphrophilus         | Aggregatibacter      | Pasteurellaceae    | 10 | 0 | 0 |
| Thauera sp. B4                      | Thauera              | Rhodocyclaceae     | 10 | 0 | 0 |

|                                 |                   |                      |    |   |   |
|---------------------------------|-------------------|----------------------|----|---|---|
| Lysobacter dokdonensis          | Lysobacter        | Xanthomonadaceae     | 10 | 0 | 0 |
| Clostridiales genomsp. BVAB3    |                   |                      | 10 | 0 | 0 |
| Streptococcus sp. I-G2          | Streptococcus     | Streptococcaceae     | 11 | 0 | 0 |
| Pseudomonas mandelii            | Pseudomonas       | Pseudomonadaceae     | 11 | 0 | 0 |
| Bradyrhizobium sp. S23321       | Bradyrhizobium    | Bradyrhizobiaceae    | 11 | 0 | 0 |
| Phenylobacterium zucineum       | Phenylobacterium  | Caulobacteraceae     | 11 | 0 | 0 |
| Pseudomonas mosselii            | Pseudomonas       | Pseudomonadaceae     | 11 | 0 | 0 |
| Staphylococcus lugdunensis      | Staphylococcus    | Staphylococcaceae    | 11 | 0 | 0 |
| Proteus mirabilis               | Proteus           | Enterobacteriaceae   | 11 | 0 | 0 |
| *                               | *                 | Neisseriaceae        | 11 | 0 | 0 |
| Arthrobacter sp. J3-40          | Arthrobacter      | Micrococcaceae       | 11 | 0 | 0 |
| *                               | Pantoea           | Enterobacteriaceae   | 12 | 0 | 0 |
| Corynebacterium efficiens       | Corynebacterium   | Corynebacteriaceae   | 12 | 0 | 0 |
| *                               | Halomonas         | Halomonadaceae       | 12 | 0 | 0 |
| Trueperella pyogenes            | Trueperella       | Actinomycetaceae     | 12 | 0 | 0 |
| Streptomyces coelicolor         | Streptomyces      | Streptomycetaceae    | 12 | 0 | 0 |
| Kocuria rhizophila              | Kocuria           | Micrococcaceae       | 13 | 0 | 0 |
| Bacillus cereus                 | Bacillus          | Bacillaceae          | 13 | 0 | 0 |
| Tannerella forsythia            | Tannerella        | Porphyromonadaceae   | 13 | 0 | 0 |
| *                               | Alkalibacterium   | Carnobacteriaceae    | 13 | 0 | 0 |
| Atopobium parvulum              | Atopobium         | Coriobacteriaceae    | 13 | 0 | 0 |
| Serinicoccus profundi           | Serinicoccus      | Intrasporangiaceae   | 13 | 0 | 0 |
| *                               | Leptotrichia      | Leptotrichiaceae     | 13 | 0 | 0 |
| *                               | *                 | Planococcaceae       | 13 | 0 | 0 |
| Planomicrobium okeanokoites     | Planomicrobium    | Planococcaceae       | 13 | 0 | 0 |
| Jannaschia sp. CCS1             | Jannaschia        | Rhodobacteraceae     | 13 | 0 | 0 |
| Paracoccus aestuarii            | Paracoccus        | Rhodobacteraceae     | 13 | 0 | 0 |
| Rhodobacter blasticus           | Rhodobacter       | Rhodobacteraceae     | 13 | 0 | 0 |
| Agrobacterium tumefaciens       | Agrobacterium     | Rhizobiaceae         | 14 | 0 | 0 |
| Shewanella sp. ANA-3            | Shewanella        | Shewanellaceae       | 14 | 0 | 0 |
| Pseudomonas cichorii            | Pseudomonas       | Pseudomonadaceae     | 14 | 0 | 0 |
| Halomonas sp. A3H3              | Halomonas         | Halomonadaceae       | 14 | 0 | 0 |
| Serratia liquefaciens           | Serratia          | Enterobacteriaceae   | 14 | 0 | 0 |
| Sphingopyxis alaskensis         | Sphingopyxis      | Sphingomonadaceae    | 14 | 0 | 0 |
| *                               | Brevundimonas     | Caulobacteraceae     | 14 | 0 | 0 |
| Deinococcus deserti             | Deinococcus       | Deinococcaceae       | 14 | 0 | 0 |
| Desulfovibrio vulgaris          | Desulfovibrio     | Desulfovibrionaceae  | 14 | 0 | 0 |
| Propionibacterium sp. NTS313073 | Propionibacterium | Propionibacteriaceae | 14 | 0 | 0 |

|                                             |                    |                     |    |   |   |
|---------------------------------------------|--------------------|---------------------|----|---|---|
| Paracoccus alcaliphilus                     | Paracoccus         | Rhodobacteraceae    | 14 | 0 | 0 |
| Vibrio parahaemolyticus                     | Vibrio             | Vibrionaceae        | 14 | 0 | 0 |
| Candidatus Saccharibacteria oral taxon TM7x |                    |                     | 14 | 0 | 0 |
| Geitlerinema sp. PCC 7407                   | Geitlerinema       |                     | 15 | 0 | 0 |
| *                                           | Actinomyces        | Actinomycetaceae    | 15 | 0 | 0 |
| Brevundimonas vesicularis                   | Brevundimonas      | Caulobacteraceae    | 15 | 0 | 0 |
| Acinetobacter sp. YS0810                    | Acinetobacter      | Moraxellaceae       | 15 | 0 | 0 |
| *                                           | Prevotella         | Prevotellaceae      | 15 | 0 | 0 |
| Methyloceanibacter caenitepidi              | Methyloceanibacter |                     | 15 | 0 | 0 |
| Leuconostoc citreum                         | Leuconostoc        | Leuconostocaceae    | 16 | 0 | 0 |
| *                                           | Bacteroides        | Bacteroidaceae      | 16 | 0 | 0 |
| Pseudomonas alcaligenes                     | Pseudomonas        | Pseudomonadaceae    | 16 | 0 | 0 |
| Methylibium petroleiphilum                  | Methylibium        |                     | 16 | 0 | 0 |
| Moraxella catarrhalis                       | Moraxella          | Moraxellaceae       | 16 | 0 | 0 |
| Sphingopyxis sp. Kp5.2                      | Sphingopyxis       | Sphingomonadaceae   | 16 | 0 | 0 |
| Pandoraea apista                            | Pandoraea          | Burkholderiaceae    | 16 | 0 | 0 |
| *                                           | Cellulomonas       | Cellulomonadaceae   | 16 | 0 | 0 |
| Olsenella uli                               | Olsenella          | Coriobacteriaceae   | 16 | 0 | 0 |
| Acinetobacter oleivorans                    | Acinetobacter      | Moraxellaceae       | 16 | 0 | 0 |
| Sphingomonas sp. 133                        | Sphingomonas       | Sphingomonadaceae   | 16 | 0 | 0 |
| Meiothermus taiwanensis                     | Meiothermus        | Thermaceae          | 16 | 0 | 0 |
| Deinococcus geothermalis                    | Deinococcus        | Deinococcaceae      | 17 | 0 | 0 |
| Lactobacillus sanfranciscensis              | Lactobacillus      | Lactobacillaceae    | 17 | 0 | 0 |
| Acinetobacter sp. LUH5605                   | Acinetobacter      | Moraxellaceae       | 17 | 0 | 0 |
| Staphylococcus simulans                     | Staphylococcus     | Staphylococcaceae   | 17 | 0 | 0 |
| Arsenophonus nasoniae                       | Arsenophonus       | Enterobacteriaceae  | 17 | 0 | 0 |
| Buchnera aphidicola                         | Buchnera           | Enterobacteriaceae  | 17 | 0 | 0 |
| Weissella koreensis                         | Weissella          | Leuconostocaceae    | 17 | 0 | 0 |
| Psychrobacter sp. G                         | Psychrobacter      | Moraxellaceae       | 17 | 0 | 0 |
| Amycolicococcus subflavus                   | Amycolicococcus    | Mycobacteriaceae    | 17 | 0 | 0 |
| Staphylococcus hyicus                       | Staphylococcus     | Staphylococcaceae   | 17 | 0 | 0 |
| Morganella morganii                         | Morganella         | Enterobacteriaceae  | 18 | 0 | 0 |
| Kyrpidia tusciae                            | Kyrpidia           | Alicyclobacillaceae | 18 | 0 | 0 |
| Ramlibacter tataouinensis                   | Ramlibacter        | Comamonadaceae      | 18 | 0 | 0 |
| Weeksella virosa                            | Weeksella          | Flavobacteriaceae   | 18 | 0 | 0 |
| Acinetobacter junii                         | Acinetobacter      | Moraxellaceae       | 18 | 0 | 0 |
| Acinetobacter sp. 26B2                      | Acinetobacter      | Moraxellaceae       | 18 | 0 | 0 |
| Mycobacterium abscessus                     | Mycobacterium      | Mycobacteriaceae    | 18 | 0 | 0 |

|                               |                  |                     |    |   |   |
|-------------------------------|------------------|---------------------|----|---|---|
| Neisseria gonorrhoeae         | Neisseria        | Neisseriaceae       | 18 | 0 | 0 |
| Sphingomonas wittichii        | Sphingomonas     | Sphingomonadaceae   | 19 | 0 | 0 |
| Bacteroides dorei             | Bacteroides      | Bacteroidaceae      | 19 | 0 | 0 |
| Corynebacterium halotolerans  | Corynebacterium  | Corynebacteriaceae  | 19 | 0 | 0 |
| Pelomonas aquatica            | Pelomonas        | Comamonadaceae      | 19 | 0 | 0 |
| Janibacter sp. TYM3221        | Janibacter       | Intrasporangiaceae  | 19 | 0 | 0 |
| *                             | Arthrobacter     | Micrococcaceae      | 19 | 0 | 0 |
| Mycobacterium gordonae        | Mycobacterium    | Mycobacteriaceae    | 19 | 0 | 0 |
| Pimelobacter simplex          | Pimelobacter     | Nocardioideaceae    | 19 | 0 | 0 |
| Pseudomonas sp. OM2164        | Pseudomonas      | Pseudomonadaceae    | 19 | 0 | 0 |
| Streptomyces albus            | Streptomyces     | Streptomycetaceae   | 20 | 0 | 0 |
| Halomonas halocynthiae        | Halomonas        | Halomonadaceae      | 20 | 0 | 0 |
| Nitrosomonas sp. AL212        | Nitrosomonas     | Nitrosomonadaceae   | 20 | 0 | 0 |
| Sphingobacterium mizutaii     | Sphingobacterium | Sphingobacteriaceae | 20 | 0 | 0 |
| Vibrio cholerae               | Vibrio           | Vibrionaceae        | 20 | 0 | 0 |
| Rickettsia felis              | Rickettsia       | Rickettsiaceae      | 21 | 0 | 0 |
| *                             | *                | Moraxellaceae       | 21 | 0 | 0 |
| Bacteroidetes bacterium WD317 |                  |                     | 21 | 0 | 0 |
| Corynebacterium casei         | Corynebacterium  | Corynebacteriaceae  | 22 | 0 | 0 |
| Corynebacterium marinum       | Corynebacterium  | Corynebacteriaceae  | 22 | 0 | 0 |
| *                             | *                | Flavobacteriaceae   | 22 | 0 | 0 |
| Caulobacter segnis            | Caulobacter      | Caulobacteraceae    | 22 | 0 | 0 |
| Lactobacillus gasseri         | Lactobacillus    | Lactobacillaceae    | 22 | 0 | 0 |
| *                             | Meiothermus      | Thermaceae          | 22 | 0 | 0 |
| Rhizobium sp. NT-26           | Rhizobium        | Rhizobiaceae        | 23 | 0 | 0 |
| Bacillus coagulans            | Bacillus         | Bacillaceae         | 23 | 0 | 0 |
| *                             | Sphingomonas     | Sphingomonadaceae   | 23 | 0 | 0 |
| *                             | Brevibacterium   | Brevibacteriaceae   | 23 | 0 | 0 |
| Nitrosomonas europaea         | Nitrosomonas     | Nitrosomonadaceae   | 23 | 0 | 0 |
| Pseudomonas alkylphenolia     | Pseudomonas      | Pseudomonadaceae    | 24 | 0 | 0 |
| Terrabacter sp. DBF63         | Terrabacter      | Intrasporangiaceae  | 24 | 0 | 0 |
| beta proteobacterium CB       |                  |                     | 24 | 0 | 0 |
| Moraxella ovis                | Moraxella        | Moraxellaceae       | 24 | 0 | 0 |
| Shewanella baltica            | Shewanella       | Shewanellaceae      | 24 | 0 | 0 |
| Mycobacterium gilvum          | Mycobacterium    | Mycobacteriaceae    | 25 | 0 | 0 |
| *                             | Exiguobacterium  |                     | 25 | 0 | 0 |
| *                             | Ochrobactrum     | Brucellaceae        | 25 | 0 | 0 |
| Geodermatophilus obscurus     | Geodermatophilus | Geodermatophilaceae | 25 | 0 | 0 |

|                                      |                 |                     |    |   |   |
|--------------------------------------|-----------------|---------------------|----|---|---|
| *                                    | Devosia         | Hyphomicrobiaceae   | 25 | 0 | 0 |
| Moraxella osloensis                  | Moraxella       | Moraxellaceae       | 25 | 0 | 0 |
| Exiguobacterium sp. 11-28            | Exiguobacterium |                     | 25 | 0 | 0 |
| Nocardioides sp. JS614               | Nocardioides    | Nocardioidaceae     | 26 | 0 | 0 |
| Nocardioides sp. USM2                | Nocardioides    | Nocardioidaceae     | 26 | 0 | 0 |
| Burkholderia gladioli                | Burkholderia    | Burkholderiaceae    | 27 | 0 | 0 |
| Renibacterium salmoninarum           | Renibacterium   | Micrococcaceae      | 27 | 0 | 0 |
| Pseudomonas syringae group gen       | Pseudomonas     | Pseudomonadaceae    | 27 | 0 | 0 |
| Bifidobacterium pseudolongum         | Bifidobacterium | Bifidobacteriaceae  | 27 | 0 | 0 |
| toluene-degrading bacterium UCR 021t |                 |                     | 27 | 0 | 0 |
| Corynebacterium imitans              | Corynebacterium | Corynebacteriaceae  | 28 | 0 | 0 |
| Corynebacterium callunae             | Corynebacterium | Corynebacteriaceae  | 28 | 0 | 0 |
| Bosea sp. WAO                        | Bosea           | Bradyrhizobiaceae   | 28 | 0 | 0 |
| Xanthobacter autotrophicus           | Xanthobacter    | Xanthobacteraceae   | 29 | 0 | 0 |
| Corynebacterium diphtheriae          | Corynebacterium | Corynebacteriaceae  | 29 | 0 | 0 |
| Bacteroides thetaiotaomicron         | Bacteroides     | Bacteroidaceae      | 29 | 0 | 0 |
| Caulobacter vibrioides               | Caulobacter     | Caulobacteraceae    | 29 | 0 | 0 |
| *                                    | *               | Pasteurellaceae     | 30 | 0 | 0 |
| Finegoldia magna                     | Finegoldia      | Peptoniphilaceae    | 30 | 0 | 0 |
| Anaerococcus prevotii                | Anaerococcus    | Peptoniphilaceae    | 30 | 0 | 0 |
| Azorhizobium caulinodans             | Azorhizobium    | Xanthobacteraceae   | 30 | 0 | 0 |
| Erysipelothrix rhusiopathiae         | Erysipelothrix  | Erysipelotrichaceae | 31 | 0 | 0 |
| Porphyromonas asaccharolytica        | Porphyromonas   | Porphyromonadaceae  | 31 | 0 | 0 |
| *                                    | Sphingopyxis    | Sphingomonadaceae   | 31 | 0 | 0 |
| Eubacterium rectale                  | Eubacterium     | Eubacteriaceae      | 32 | 0 | 0 |
| Acinetobacter venetianus             | Acinetobacter   | Moraxellaceae       | 33 | 0 | 0 |
| Variovorax paradoxus                 | Variovorax      | Comamonadaceae      | 33 | 0 | 0 |
| Acinetobacter sp. ED45-25            | Acinetobacter   | Moraxellaceae       | 33 | 0 | 0 |
| Bradyrhizobium diazoefficiens        | Bradyrhizobium  | Bradyrhizobiaceae   | 34 | 0 | 0 |
| Bradyrhizobium japonicum             | Bradyrhizobium  | Bradyrhizobiaceae   | 35 | 0 | 0 |
| Megamonas hypermegale                | Megamonas       | Veillonellaceae     | 35 | 0 | 0 |
| *                                    | Methylobacillus | Methylophilaceae    | 35 | 0 | 0 |
| Nocardiopsis alba                    | Nocardiopsis    | Nocardiopsaceae     | 35 | 0 | 0 |
| Modestobacter marinus                | Modestobacter   | Geodermatophilaceae | 36 | 0 | 0 |
| Corynebacterium doosanense           | Corynebacterium | Corynebacteriaceae  | 37 | 0 | 0 |
| Blastococcus saxobidens              | Blastococcus    | Geodermatophilaceae | 38 | 0 | 0 |
| Anoxybacillus flavithermus           | Anoxybacillus   | Bacillaceae         | 38 | 0 | 0 |
| Aeromonas caviae                     | Aeromonas       | Aeromonadaceae      | 40 | 0 | 0 |

|                              |                  |                    |       |   |   |
|------------------------------|------------------|--------------------|-------|---|---|
| Bacillus subtilis            | Bacillus         | Bacillaceae        | 40    | 0 | 0 |
| Elizabethkingia anophelis    | Elizabethkingia  | Flavobacteriaceae  | 40    | 0 | 0 |
| Staphylococcus hominis       | Staphylococcus   | Staphylococcaceae  | 44    | 0 | 0 |
| Ruminococcus bicirculans     | Ruminococcus     | Ruminococcaceae    | 45    | 0 | 0 |
| Paracoccus marcusii          | Paracoccus       | Rhodobacteraceae   | 45    | 0 | 0 |
| *                            | Psychrobacter    | Moraxellaceae      | 46    | 0 | 0 |
| Sphingomonas sanxanigenens   | Sphingomonas     | Sphingomonadaceae  | 47    | 0 | 0 |
| *                            | *                | Leuconostocaceae   | 47    | 0 | 0 |
| *                            | *                | Burkholderiaceae   | 49    | 0 | 0 |
| Bacteroides vulgatus         | Bacteroides      | Bacteroidaceae     | 50    | 0 | 0 |
| Rhodopseudomonas palustris   | Rhodopseudomonas | Bradyrhizobiaceae  | 51    | 0 | 0 |
| Pantoea agglomerans          | Pantoea          | Enterobacteriaceae | 52    | 0 | 0 |
| *                            | *                | Sphingomonadaceae  | 53    | 0 | 0 |
| Mycobacterium kansasii       | Mycobacterium    | Mycobacteriaceae   | 53    | 0 | 0 |
| *                            | Streptomyces     | Streptomycetaceae  | 55    | 0 | 0 |
| Enterococcus faecalis        | Enterococcus     | Enterococcaceae    | 55    | 0 | 0 |
| Acinetobacter sp. NFM2       | Acinetobacter    | Moraxellaceae      | 57    | 0 | 0 |
| Shewanella putrefaciens      | Shewanella       | Shewanellaceae     | 62    | 0 | 0 |
| Bifidobacterium adolescentis | Bifidobacterium  | Bifidobacteriaceae | 63    | 0 | 0 |
| *                            | Bifidobacterium  | Bifidobacteriaceae | 66    | 0 | 0 |
| Porphyromonas gingivalis     | Porphyromonas    | Porphyromonadaceae | 68    | 0 | 0 |
| Neisseria meningitidis       | Neisseria        | Neisseriaceae      | 69    | 0 | 0 |
| Rhodococcus pyridinivorans   | Rhodococcus      | Nocardiaceae       | 70    | 0 | 0 |
| Aeromonas salmonicida        | Aeromonas        | Aeromonadaceae     | 73    | 0 | 0 |
| Planococcus sp. PAMC 21323   | Planococcus      | Planococcaceae     | 75    | 0 | 0 |
| Pseudomonas simiae           | Pseudomonas      | Pseudomonadaceae   | 81    | 0 | 0 |
| Faecalibacterium prausnitzii | Faecalibacterium | Ruminococcaceae    | 95    | 0 | 0 |
| Acinetobacter Iwoffii        | Acinetobacter    | Moraxellaceae      | 142   | 0 | 0 |
| Exiguobacterium sp. N139     | Exiguobacterium  |                    | 146   | 0 | 0 |
| Streptococcus anginosus      | Streptococcus    | Streptococcaceae   | 156   | 0 | 0 |
| Thauera sp. MZ1T             | Thauera          | Rhodocyclaceae     | 159   | 0 | 0 |
| *                            | Shewanella       | Shewanellaceae     | 226   | 0 | 0 |
| *                            | Aeromonas        | Aeromonadaceae     | 332   | 0 | 0 |
| Staphylococcus aureus        | Staphylococcus   | Staphylococcaceae  | 407   | 0 | 0 |
| Aeromonas hydrophila         | Aeromonas        | Aeromonadaceae     | 537   | 0 | 0 |
| Aeromonas veronii            | Aeromonas        | Aeromonadaceae     | 563   | 0 | 0 |
| Bifidobacterium breve        | Bifidobacterium  | Bifidobacteriaceae | 892   | 0 | 0 |
| Bacillus megaterium          | Bacillus         | Bacillaceae        | 2,131 | 0 | 0 |
