# Supplementary material
Source: PubMed Central journal article supplement (PMC6251619)
Supplement: piw066_suppl_supplementary_table_4.pdf [file piw066_suppl_supplementary_table_4.pdf]

**Supplementary Table 4.** Bacterial taxa identified by mNGS using an RPM ratio metric

\*re-classified to a higher taxonomic rank because reads aligned equally well to multiple different organisms that shared the same species, genus or family

#positive result according to an RPM (reads per million) ratio  $\geq 10$ , where the RPM ratio = RPM(sample) / RPM(NTC)

&reads correspond to the *Streptococcus agalactiae* PC

Abbreviations: PC, positive control; CSF, cerebrospinal fluid; mNGS, metagenomic next-generation sequencing; RPM, reads per million

| species                                    | genus                 | family                  | Normalized Reads Per million |                   |
|--------------------------------------------|-----------------------|-------------------------|------------------------------|-------------------|
|                                            |                       |                         | DNA PC                       | DNA Patient CSF   |
| *                                          | Brucella              | Brucellaceae            | 0.0                          | 15.7 <sup>#</sup> |
| Brucella melitensis                        | Brucella              | Brucellaceae            | 0.0                          | 1.6               |
| Streptococcus agalactiae                   | Streptococcus         | Streptococcaceae        | 3,264.1 <sup>#</sup>         | 0.0               |
| Klebsiella pneumoniae                      | Klebsiella            | Enterobacteriaceae      | 52.9 <sup>#</sup>            | 0.0               |
| *                                          | *                     | Enterobacteriaceae      | 0.1                          | 0.0               |
| Escherichia coli                           | Escherichia           | Enterobacteriaceae      | 0.0                          | 0.0               |
| Propionibacterium acnes                    | Propionibacterium     | Propionibacteriaceae    | 0.0                          | 0.0               |
| *                                          | Streptococcus         | Streptococcaceae        | 8.7                          | 0.0               |
| *                                          | Klebsiella            | Enterobacteriaceae      | 41.6 <sup>#</sup>            | 0.0               |
| *                                          | *                     | *                       | 0.0                          | 0.0               |
| Streptococcus suis                         | Streptococcus         | Streptococcaceae        | 16.2 <sup>#&amp;</sup>       | 0.0               |
| Streptococcus salivarius                   | Streptococcus         | Streptococcaceae        | 1.0                          | 0.0               |
| Streptococcus pyogenes                     | Streptococcus         | Streptococcaceae        | 30.7 <sup>#&amp;</sup>       | 0.0               |
| Serratia marcescens                        | Serratia              | Enterobacteriaceae      | 2.3                          | 0.0               |
| Lactococcus lactis                         | Lactococcus           | Streptococcaceae        | 0.4                          | 0.0               |
| *                                          | Escherichia           | Enterobacteriaceae      | 0.0                          | 0.0               |
| Pseudomonas sp. TKP                        | Pseudomonas           | Pseudomonadaceae        | 0.1                          | 0.0               |
| *                                          | Pseudomonas           | Pseudomonadaceae        | 0.2                          | 0.0               |
| Streptococcus macedonicus                  | Streptococcus         | Streptococcaceae        | 18.2 <sup>#&amp;</sup>       | 0.0               |
| Enterobacter cloacae                       | Enterobacter          | Enterobacteriaceae      | 0.4                          | 0.0               |
| Klebsiella oxytoca                         | Klebsiella            | Enterobacteriaceae      | 0.7                          | 0.0               |
| Thermoanaerobacterium thermosaccharophilum | Thermoanaerobacterium | Thermoanaerobacteriales | 0.2                          | 0.0               |
| Streptococcus sp. VT 162                   | Streptococcus         | Streptococcaceae        | 0.6                          | 0.0               |
| Enterococcus faecium                       | Enterococcus          | Enterococcaceae         | 0.1                          | 0.1               |
| Pseudomonas protegens                      | Pseudomonas           | Pseudomonadaceae        | 3.0                          | 0.1               |
| Micrococcus luteus                         | Micrococcus           | Micrococcaceae          | 0.0                          | 0.0               |

|                                 |                   |                      |     |     |
|---------------------------------|-------------------|----------------------|-----|-----|
| Streptococcus infantarius       | Streptococcus     | Streptococcaceae     | 0.5 | 0.0 |
| Staphylococcus epidermidis      | Staphylococcus    | Staphylococcaceae    | 0.0 | 0.0 |
| Enterobacter asburiae           | Enterobacter      | Enterobacteriaceae   | 0.2 | 0.0 |
| Cupriavidus metallidurans       | Cupriavidus       | Burkholderiaceae     | 0.0 | 0.0 |
| Pseudomonas putida              | Pseudomonas       | Pseudomonadaceae     | 0.1 | 0.0 |
| Enterococcus casseliflavus      | Enterococcus      | Enterococcaceae      | 0.1 | 0.1 |
| Streptococcus mitis             | Streptococcus     | Streptococcaceae     | 0.6 | 0.0 |
| Streptococcus equi              | Streptococcus     | Streptococcaceae     | 5.2 | 0.0 |
| Salmonella enterica             | Salmonella        | Enterobacteriaceae   | 4.9 | 0.0 |
| Streptococcus oralis            | Streptococcus     | Streptococcaceae     | 0.5 | 0.0 |
| Klebsiella variicola            | Klebsiella        | Enterobacteriaceae   | 4.3 | 0.0 |
| Burkholderia lata               | Burkholderia      | Burkholderiaceae     | 0.3 | 0.0 |
| Pseudomonas stutzeri            | Pseudomonas       | Pseudomonadaceae     | 0.0 | 0.0 |
| Streptococcus pneumoniae        | Streptococcus     | Streptococcaceae     | 0.4 | 0.0 |
| Streptococcus dysgalactiae      | Streptococcus     | Streptococcaceae     | 3.7 | 0.0 |
| *                               | Burkholderia      | Burkholderiaceae     | 0.1 | 0.0 |
| Pseudomonas fluorescens         | Pseudomonas       | Pseudomonadaceae     | 0.4 | 0.0 |
| Acinetobacter guillouiae        | Acinetobacter     | Moraxellaceae        | 0.1 | 0.0 |
| Veillonella parvula             | Veillonella       | Veillonellaceae      | 0.1 | 0.0 |
| Xanthomonas campestris          | Xanthomonas       | Xanthomonadaceae     | 0.1 | 0.1 |
| Exiguobacterium sp. AT1b        | Exiguobacterium   |                      | 0.1 | 0.0 |
| Pseudomonas pseudoalcaligenes   | Pseudomonas       | Pseudomonadaceae     | 0.0 | 0.0 |
| Streptococcus pasteurianus      | Streptococcus     | Streptococcaceae     | 2.8 | 0.0 |
| Rothia dentocariosa             | Rothia            | Micrococcaceae       | 0.1 | 0.0 |
| *                               | *                 | Streptococcaceae     | 2.6 | 0.0 |
| Delftia acidovorans             | Delftia           | Comamonadaceae       | 0.5 | 0.0 |
| *                               | Propionibacterium | Propionibacteriaceae | 0.0 | 0.0 |
| Acinetobacter baumannii         | Acinetobacter     | Moraxellaceae        | 0.0 | 0.0 |
| Streptococcus parasanguinis     | Streptococcus     | Streptococcaceae     | 0.0 | 0.0 |
| Pseudomonas sp. WCS374          | Pseudomonas       | Pseudomonadaceae     | 0.8 | 0.0 |
| Enterobacter aerogenes          | Enterobacter      | Enterobacteriaceae   | 2.3 | 0.0 |
| Stenotrophomonas maltophilia    | Stenotrophomonas  | Xanthomonadaceae     | 0.2 | 0.0 |
| Alicyclobacillus acidocaldarius | Alicyclobacillus  | Alicyclobacillaceae  | 0.2 | 0.0 |
| Haemophilus influenzae          | Haemophilus       | Pasteurellaceae      | 0.1 | 0.0 |
| Rothia mucilaginosa             | Rothia            | Micrococcaceae       | 0.0 | 0.0 |
| Staphylococcus xylosus          | Staphylococcus    | Staphylococcaceae    | 0.2 | 0.0 |
| Acidovorax sp. JS42             | Acidovorax        | Comamonadaceae       | 0.1 | 0.0 |
| *                               | Rahnella          | Enterobacteriaceae   | 1.8 | 0.0 |
| Streptococcus pseudopneumoniae  | Streptococcus     | Streptococcaceae     | 0.3 | 0.0 |
| Streptococcus thermophilus      | Streptococcus     | Streptococcaceae     | 0.1 | 0.0 |
| Pseudomonas aeruginosa          | Pseudomonas       | Pseudomonadaceae     | 0.1 | 0.0 |

|                                            |                              |                        |     |     |
|--------------------------------------------|------------------------------|------------------------|-----|-----|
| <i>Corynebacterium kroppenstedtii</i>      | <i>Corynebacterium</i>       | Corynebacteriaceae     | 1.6 | 0.0 |
| <i>Staphylococcus haemolyticus</i>         | <i>Staphylococcus</i>        | Staphylococcaceae      | 0.0 | 0.0 |
| <i>Serratia</i> sp. SCBI                   | <i>Serratia</i>              | Enterobacteriaceae     | 1.5 | 0.0 |
| *                                          | <i>Enterococcus</i>          | Enterococcaceae        | 0.1 | 0.0 |
| <i>Staphylococcus warneri</i>              | <i>Staphylococcus</i>        | Staphylococcaceae      | 0.0 | 0.0 |
| <i>Burkholderia cepacia</i>                | <i>Burkholderia</i>          | Burkholderiaceae       | 0.1 | 0.1 |
| *                                          | <i>Corynebacterium</i>       | Corynebacteriaceae     | 0.0 | 0.0 |
| <i>Comamonas testosteroni</i>              | <i>Comamonas</i>             | Comamonadaceae         | 0.0 | 0.0 |
| <i>Bifidobacterium thermophilum</i>        | <i>Bifidobacterium</i>       | Bifidobacteriaceae     | 1.3 | 0.0 |
| *                                          | <i>Lactobacillus</i>         | Lactobacillaceae       | 0.2 | 0.0 |
| <i>Thermoanaerobacterium xylanolyticum</i> | <i>Thermoanaerobacterium</i> | Thermoanaerobacterales | 0.1 | 0.0 |
| <i>Ralstonia pickettii</i>                 | <i>Ralstonia</i>             | Burkholderiaceae       | 0.1 | 0.0 |
| <i>Meiothermus ruber</i>                   | <i>Meiothermus</i>           | Thermaceae             | 0.0 | 0.0 |
| <i>Acidovorax ebreus</i>                   | <i>Acidovorax</i>            | Comamonadaceae         | 0.7 | 0.0 |
| <i>Micrococcus</i> sp. V7                  | <i>Micrococcus</i>           | Micrococcaceae         | 0.2 | 0.0 |
| <i>Leuconostoc mesenteroides</i>           | <i>Leuconostoc</i>           | Leuconostocaceae       | 0.0 | 0.0 |
| <i>Bacillus halodurans</i>                 | <i>Bacillus</i>              | Bacillaceae            | 0.7 | 0.0 |
| <i>Corynebacterium variabile</i>           | <i>Corynebacterium</i>       | Corynebacteriaceae     | 0.3 | 0.0 |
| *                                          | <i>Acidovorax</i>            | Comamonadaceae         | 0.1 | 0.0 |
| <i>Bifidobacterium bifidum</i>             | <i>Bifidobacterium</i>       | Bifidobacteriaceae     | 0.0 | 0.0 |
| <i>Rhizobium</i> sp. IRBG74                | <i>Rhizobium</i>             | Rhizobiaceae           | 0.0 | 0.0 |
| *                                          | <i>Acinetobacter</i>         | Moraxellaceae          | 0.0 | 0.0 |
| <i>Acinetobacter calcoaceticus</i>         | <i>Acinetobacter</i>         | Moraxellaceae          | 1.0 | 0.0 |
| <i>Chroococcidiopsis thermalis</i>         | <i>Chroococcidiopsis</i>     |                        | 0.2 | 0.0 |
| <i>Streptococcus sanguinis</i>             | <i>Streptococcus</i>         | Streptococcaceae       | 0.1 | 0.0 |
| <i>Acidovorax</i> sp. KKS102               | <i>Acidovorax</i>            | Comamonadaceae         | 0.1 | 0.0 |
| <i>Raoultella ornithinolytica</i>          | <i>Raoultella</i>            | Enterobacteriaceae     | 0.1 | 0.0 |
| <i>Ochrobactrum anthropi</i>               | <i>Ochrobactrum</i>          | Brucellaceae           | 0.0 | 0.0 |
| <i>Lactobacillus johnsonii</i>             | <i>Lactobacillus</i>         | Lactobacillaceae       | 0.6 | 0.1 |
| <i>Methylobacterium populi</i>             | <i>Methylobacterium</i>      | Methylobacteriaceae    | 0.2 | 0.0 |
| <i>Rhodococcus equi</i>                    | <i>Rhodococcus</i>           | Nocardiaceae           | 0.1 | 0.0 |
| <i>Lactobacillus helveticus</i>            | <i>Lactobacillus</i>         | Lactobacillaceae       | 0.9 | 0.0 |
| *                                          | <i>Serratia</i>              | Enterobacteriaceae     | 0.2 | 0.0 |
| <i>Burkholderia cenocepacia</i>            | <i>Burkholderia</i>          | Burkholderiaceae       | 0.3 | 0.0 |
| *                                          | <i>Staphylococcus</i>        | Staphylococcaceae      | 0.0 | 0.0 |
| <i>Enterobacter</i> sp. R4-368             | <i>Enterobacter</i>          | Enterobacteriaceae     | 0.8 | 0.0 |
| <i>Propionibacterium propionicum</i>       | <i>Propionibacterium</i>     | Propionibacteriaceae   | 0.1 | 0.0 |
| <i>Streptococcus gordonii</i>              | <i>Streptococcus</i>         | Streptococcaceae       | 0.1 | 0.0 |
| <i>Corynebacterium singulare</i>           | <i>Corynebacterium</i>       | Corynebacteriaceae     | 0.1 | 0.0 |
| <i>Burkholderia ambifaria</i>              | <i>Burkholderia</i>          | Burkholderiaceae       | 0.7 | 0.1 |
| *                                          | <i>Micrococcus</i>           | Micrococcaceae         | 0.0 | 0.0 |

|                                       |                       |                        |     |     |
|---------------------------------------|-----------------------|------------------------|-----|-----|
| Fervidobacterium nodosum              | Fervidobacterium      | Thermotogaceae         | 0.0 | 0.0 |
| Aeromonas media                       | Aeromonas             | Aeromonadaceae         | 0.0 | 0.0 |
| Cronobacter sakazakii                 | Cronobacter           | Enterobacteriaceae     | 0.7 | 0.0 |
| Myroides profundi                     | Myroides              | Flavobacteriaceae      | 0.7 | 0.0 |
| Methylobacterium oryzae               | Methylobacterium      | Methylobacteriaceae    | 0.7 | 0.0 |
| *                                     | Xanthomonas           | Xanthomonadaceae       | 0.3 | 0.0 |
| Thermoanaerobacterium saccharolyticum | Thermoanaerobacterium | Thermoanaerobacterales | 0.1 | 0.0 |
| Pseudomonas mendocina                 | Pseudomonas           | Pseudomonadaceae       | 0.0 | 0.0 |
| Corynebacterium ureicelerivorans      | Corynebacterium       | Corynebacteriaceae     | 0.0 | 0.0 |
| Lactobacillus crispatus               | Lactobacillus         | Lactobacillaceae       | 0.0 | 0.0 |
| Alicyclophilus denitrificans          | Alicyclophilus        | Comamonadaceae         | 0.0 | 0.0 |
| Gardnerella vaginalis                 | Gardnerella           | Bifidobacteriaceae     | 0.0 | 0.0 |
| *                                     | Gemella               |                        | 0.6 | 0.0 |
| *                                     | Ralstonia             | Burkholderiaceae       | 0.6 | 0.0 |
| Eggerthella lenta                     | Eggerthella           | Coriobacteriaceae      | 0.6 | 0.0 |
| *                                     | *                     | Rhizobiaceae           | 0.5 | 0.0 |
| Prevotella denticola                  | Prevotella            | Prevotellaceae         | 0.2 | 0.0 |
| Prevotella intermedia                 | Prevotella            | Prevotellaceae         | 0.2 | 0.0 |
| Psychrobacter sp. PRwf-1              | Psychrobacter         | Moraxellaceae          | 0.1 | 0.0 |
| Azospira oryzae                       | Azospira              | Rhodocyclaceae         | 0.1 | 0.0 |
| Acinetobacter haemolyticus            | Acinetobacter         | Moraxellaceae          | 0.1 | 0.0 |
| *                                     | Delftia               | Comamonadaceae         | 0.1 | 0.0 |
| Burkholderia contaminans              | Burkholderia          | Burkholderiaceae       | 0.4 | 0.2 |
| Arthrobacter arilaitensis             | Arthrobacter          | Micrococcaceae         | 0.1 | 0.1 |
| Dermacoccus nishinomiyensis           | Dermacoccus           | Dermacoccaceae         | 0.1 | 0.1 |
| Pantoea ananatis                      | Pantoea               | Enterobacteriaceae     | 0.1 | 0.0 |
| Staphylococcus saprophyticus          | Staphylococcus        | Staphylococcaceae      | 0.0 | 0.0 |
| Staphylococcus pasteurii              | Staphylococcus        | Staphylococcaceae      | 0.0 | 0.0 |
| Rahnella aquatilis                    | Rahnella              | Enterobacteriaceae     | 0.5 | 0.0 |
| Rahnella sp. Y9602                    | Rahnella              | Enterobacteriaceae     | 0.5 | 0.0 |
| Campylobacter concisus                | Campylobacter         | Campylobacteraceae     | 0.5 | 0.0 |
| Geobacillus sp. WCH70                 | Geobacillus           | Bacillaceae            | 0.5 | 0.0 |
| *                                     | Frankia               | Frankiaceae            | 0.5 | 0.0 |
| Lactobacillus casei                   | Lactobacillus         | Lactobacillaceae       | 0.5 | 0.0 |
| Thiomonas intermedia                  | Thiomonas             |                        | 0.5 | 0.0 |
| Streptococcus gallolyticus            | Streptococcus         | Streptococcaceae       | 0.5 | 0.0 |
| Thioalkalivibrio sulfidiphilus        | Thioalkalivibrio      | Ectothiorhodospiraceae | 0.3 | 0.0 |
| *                                     | Bradyrhizobium        | Bradyrhizobiaceae      | 0.2 | 0.0 |
| Bifidobacterium longum                | Bifidobacterium       | Bifidobacteriaceae     | 0.1 | 0.0 |
| Corynebacterium falsenii              | Corynebacterium       | Corynebacteriaceae     | 0.1 | 0.0 |
| Delftia sp. Cs1-4                     | Delftia               | Comamonadaceae         | 0.1 | 0.0 |

|                                   |                   |                      |     |     |
|-----------------------------------|-------------------|----------------------|-----|-----|
| Acinetobacter sp. M131            | Acinetobacter     | Moraxellaceae        | 0.0 | 0.0 |
| Prevotella melaninogenica         | Prevotella        | Prevotellaceae       | 0.0 | 0.0 |
| *                                 | *                 | Comamonadaceae       | 0.0 | 0.0 |
| Leuconostoc carnosum              | Leuconostoc       | Leuconostocaceae     | 0.2 | 0.0 |
| Pectobacterium carotovorum        | Pectobacterium    | Enterobacteriaceae   | 0.0 | 0.0 |
| *                                 | Myroides          | Flavobacteriaceae    | 0.4 | 0.0 |
| *                                 | Erwinia           | Enterobacteriaceae   | 0.4 | 0.0 |
| Gordonia sp. KTR9                 | Gordonia          | Gordoniaceae         | 0.4 | 0.0 |
| Paenibacillus sp. FSL R7-0273     | Paenibacillus     | Paenibacillaceae     | 0.4 | 0.0 |
| Paracoccus sp. N81106             | Paracoccus        | Rhodobacteraceae     | 0.4 | 0.0 |
| Sphingobium fuliginis             | Sphingobium       | Sphingomonadaceae    | 0.4 | 0.0 |
| *                                 | *                 |                      | 0.4 | 0.0 |
| *                                 | Geobacillus       | Bacillaceae          | 0.2 | 0.0 |
| Pseudomonas sp. VLB120            | Pseudomonas       | Pseudomonadaceae     | 0.2 | 0.0 |
| Pelagibacterium halotolerans      | Pelagibacterium   | Hyphomicrobiaceae    | 0.1 | 0.0 |
| Streptococcus intermedius         | Streptococcus     | Streptococcaceae     | 0.1 | 0.0 |
| Propionibacterium freudenreichii  | Propionibacterium | Propionibacteriaceae | 0.1 | 0.0 |
| *                                 | Enterobacter      | Enterobacteriaceae   | 0.0 | 0.0 |
| Nakamurella multipartita          | Nakamurella       | Nakamurellaceae      | 0.1 | 0.1 |
| Haemophilus parasuis              | Haemophilus       | Pasteurellaceae      | 0.3 | 0.0 |
| Fusobacterium nucleatum           | Fusobacterium     | Fusobacteriaceae     | 0.3 | 0.0 |
| Citrobacter freundii              | Citrobacter       | Enterobacteriaceae   | 0.3 | 0.0 |
| Ruminococcus sp. SR1/5            | Ruminococcus      | Ruminococcaceae      | 0.2 | 0.0 |
| Pseudoxanthomonas spadix          | Pseudoxanthomonas | Xanthomonadaceae     | 0.2 | 0.0 |
| Lactococcus garvieae              | Lactococcus       | Streptococcaceae     | 0.1 | 0.0 |
| Neisseria elongata                | Neisseria         | Neisseriaceae        | 0.1 | 0.0 |
| Acidovorax citrulli               | Acidovorax        | Comamonadaceae       | 0.1 | 0.0 |
| Novosphingobium pentaromativorans | Novosphingobium   | Sphingomonadaceae    | 0.1 | 0.0 |
| Citrobacter koseri                | Citrobacter       | Enterobacteriaceae   | 0.1 | 0.0 |
| Methylobacterium aquaticum        | Methylobacterium  | Methylobacteriaceae  | 0.1 | 0.0 |
| Pseudomonas denitrificans         | Pseudomonas       | Pseudomonadaceae     | 0.1 | 0.0 |
| Rhodococcus erythropolis          | Rhodococcus       | Nocardiaceae         | 0.0 | 0.0 |
| Lactobacillus reuteri             | Lactobacillus     | Lactobacillaceae     | 0.0 | 0.0 |
| Bacteroides fragilis              | Bacteroides       | Bacteroidaceae       | 0.0 | 0.0 |
| Lactobacillus plantarum           | Lactobacillus     | Lactobacillaceae     | 0.0 | 0.0 |
| *                                 | Bacillus          | Bacillaceae          | 0.0 | 0.0 |
| Pseudomonas rhizosphaerae         | Pseudomonas       | Pseudomonadaceae     | 0.2 | 0.1 |
| Achromobacter xylosoxidans        | Achromobacter     | Alcaligenaceae       | 0.0 | 0.0 |
| Lactobacillus amylovorus          | Lactobacillus     | Lactobacillaceae     | 0.2 | 0.0 |
| Propionibacterium acidipropionici | Propionibacterium | Propionibacteriaceae | 0.2 | 0.0 |
| Leuconostoc gelidum               | Leuconostoc       | Leuconostocaceae     | 0.2 | 0.0 |

|                                     |                   |                        |     |     |
|-------------------------------------|-------------------|------------------------|-----|-----|
| Weissella thailandensis             | Weissella         | Leuconostocaceae       | 0.2 | 0.0 |
| Pandoraea sp. RB-44                 | Pandoraea         | Burkholderiaceae       | 0.2 | 0.0 |
| Escherichia vulneris                | Escherichia       | Enterobacteriaceae     | 0.2 | 0.0 |
| Yersinia intermedia                 | Yersinia          | Enterobacteriaceae     | 0.2 | 0.0 |
| Flavobacteriaceae bacterium 3519-10 |                   | Flavobacteriaceae      | 0.2 | 0.0 |
| *                                   | Rhodococcus       | Nocardiaceae           | 0.2 | 0.0 |
| Streptococcus sp. (N1)              | Streptococcus     | Streptococcaceae       | 0.2 | 0.0 |
| *                                   | Methylobacterium  | Methylobacteriaceae    | 0.1 | 0.0 |
| Sphingomonas sp. MM-1               | Sphingomonas      | Sphingomonadaceae      | 0.1 | 0.0 |
| Rhizobium etli                      | Rhizobium         | Rhizobiaceae           | 0.1 | 0.0 |
| *                                   | Agrobacterium     | Rhizobiaceae           | 0.0 | 0.0 |
| Thermus scotoductus                 | Thermus           | Thermaceae             | 0.0 | 0.0 |
| Methylobacterium extorquens         | Methylobacterium  | Methylobacteriaceae    | 0.0 | 0.0 |
| Streptococcus sp. I-P16             | Streptococcus     | Streptococcaceae       | 0.0 | 0.0 |
| Pantoea sp. PSNIH1                  | Pantoea           | Enterobacteriaceae     | 0.0 | 0.0 |
| Methylobacterium radiotolerans      | Methylobacterium  | Methylobacteriaceae    | 0.0 | 0.0 |
| [Ruminococcus] torques              | Blautia           | Lachnospiraceae        | 0.1 | 0.4 |
| Lactobacillus sakei                 | Lactobacillus     | Lactobacillaceae       | 0.1 | 0.1 |
| *                                   | *                 | Rhodocyclaceae         | 0.1 | 0.1 |
| Bacillus licheniformis              | Bacillus          | Bacillaceae            | 0.0 | 0.1 |
| Corynebacterium accolens            | Corynebacterium   | Corynebacteriaceae     | 0.1 | 0.0 |
| Corynebacterium sp. ATCC 6931       | Corynebacterium   | Corynebacteriaceae     | 0.1 | 0.0 |
| Serratia symbiotica                 | Serratia          | Enterobacteriaceae     | 0.1 | 0.0 |
| Lactobacillus delbrueckii           | Lactobacillus     | Lactobacillaceae       | 0.1 | 0.0 |
| Bacillus sp. YP1                    | Bacillus          | Bacillaceae            | 0.1 | 0.0 |
| Klebsiella sp. PG122E               | Klebsiella        | Enterobacteriaceae     | 0.1 | 0.0 |
| *                                   | Rathayibacter     | Microbacteriaceae      | 0.1 | 0.0 |
| Pseudoalteromonas sp. P30           | Pseudoalteromonas | Pseudoalteromonadaceae | 0.1 | 0.0 |
| Staphylococcus sp. CDC25            | Staphylococcus    | Staphylococcaceae      | 0.1 | 0.0 |
| Corynebacterium resistens           | Corynebacterium   | Corynebacteriaceae     | 0.1 | 0.0 |
| Shigella dysenteriae                | Shigella          | Enterobacteriaceae     | 0.1 | 0.0 |
| *                                   | *                 | Xanthomonadaceae       | 0.1 | 0.0 |
| Agrobacterium fabrum                | Agrobacterium     | Rhizobiaceae           | 0.0 | 0.0 |
| Gordonia polyisoprenivorans         | Gordonia          | Gordoniaceae           | 0.0 | 0.0 |
| Pseudomonas balearica               | Pseudomonas       | Pseudomonadaceae       | 0.0 | 0.0 |
| *                                   | *                 | Pseudomonadaceae       | 0.0 | 0.0 |
| Ruminococcus bromii                 | Ruminococcus      | Ruminococcaceae        | 0.0 | 0.0 |
| Brachybacterium faecium             | Brachybacterium   | Dermabacteraceae       | 0.0 | 0.0 |
| Acinetobacter johnsonii             | Acinetobacter     | Moraxellaceae          | 0.0 | 0.0 |
| Micrococcus sp. A1                  | Micrococcus       | Micrococcaceae         | 0.0 | 0.0 |
| Filifactor alocis                   | Filifactor        | Peptostreptococcaceae  | 0.0 | 0.0 |

|                                        |                          |                     |     |     |
|----------------------------------------|--------------------------|---------------------|-----|-----|
| <i>Pantoea vagans</i>                  | <i>Pantoea</i>           | Enterobacteriaceae  | 0.0 | 0.0 |
| <i>Haemophilus parainfluenzae</i>      | <i>Haemophilus</i>       | Pasteurellaceae     | 0.0 | 0.0 |
| <i>Pantoea rwandensis</i>              | <i>Pantoea</i>           | Enterobacteriaceae  | 0.0 | 0.3 |
| <i>Corynebacterium vitaeruminis</i>    | <i>Corynebacterium</i>   | Corynebacteriaceae  | 0.0 | 0.2 |
| <i>Pseudomonas poae</i>                | <i>Pseudomonas</i>       | Pseudomonadaceae    | 0.0 | 0.1 |
| *                                      | *                        | Brucellaceae        | 0.0 | 0.1 |
| <i>Lactobacillus fermentum</i>         | <i>Lactobacillus</i>     | Lactobacillaceae    | 0.0 | 0.1 |
| <i>Anabaena variabilis</i>             | <i>Anabaena</i>          | Nostocaceae         | 0.0 | 0.1 |
| <i>Sphingobacterium</i> sp. ML3W       | <i>Sphingobacterium</i>  | Sphingobacteriaceae | 0.0 | 0.1 |
| sugarcane isolate 74-1                 |                          |                     | 0.0 | 0.1 |
| *                                      | *                        | Geodermatophilaceae | 0.0 | 0.1 |
| <i>Megasphaera elsdenii</i>            | <i>Megasphaera</i>       | Veillonellaceae     | 0.0 | 0.1 |
| <i>Pseudoxanthomonas suwonensis</i>    | <i>Pseudoxanthomonas</i> | Xanthomonadaceae    | 0.0 | 0.1 |
| <i>Corynebacterium glutamicum</i>      | <i>Corynebacterium</i>   | Corynebacteriaceae  | 0.0 | 0.0 |
| <i>Sphingomonas taxi</i>               | <i>Sphingomonas</i>      | Sphingomonadaceae   | 0.0 | 0.0 |
| <i>Pseudomonas graminis</i>            | <i>Pseudomonas</i>       | Pseudomonadaceae    | 0.0 | 0.0 |
| <i>Bradyrhizobium</i> sp. BTAi1        | <i>Bradyrhizobium</i>    | Bradyrhizobiaceae   | 0.0 | 0.0 |
| <i>Enterococcus hirae</i>              | <i>Enterococcus</i>      | Enterococcaceae     | 0.0 | 0.0 |
| <i>Corynebacterium</i> sp. L2-79-05    | <i>Corynebacterium</i>   | Corynebacteriaceae  | 0.0 | 0.0 |
| <i>Arthrobacter phenanthrenivorans</i> | <i>Arthrobacter</i>      | Micrococcaceae      | 0.0 | 0.0 |
| <i>Corynebacterium maris</i>           | <i>Corynebacterium</i>   | Corynebacteriaceae  | 0.0 | 0.0 |
| <i>Gordonia bronchialis</i>            | <i>Gordonia</i>          | Gordoniaceae        | 0.0 | 0.0 |
| <i>Kytococcus sedentarius</i>          | <i>Kytococcus</i>        | Dermacoccaceae      | 0.0 | 0.0 |
| <i>Kosakonia cowanii</i>               | <i>Kosakonia</i>         | Enterobacteriaceae  | 0.0 | 0.0 |
| <i>Xenorhabdus bovienii</i>            | <i>Xenorhabdus</i>       | Enterobacteriaceae  | 0.0 | 0.0 |
| <i>Paracoccus haeundaensis</i>         | <i>Paracoccus</i>        | Rhodobacteraceae    | 0.0 | 0.0 |
| <i>Methylobacterium</i> sp. 238        | <i>Methylobacterium</i>  | Methylobacteriaceae | 0.0 | 0.0 |
| <i>Acinetobacter</i> sp. BW3           | <i>Acinetobacter</i>     | Moraxellaceae       | 0.0 | 0.0 |
| <i>Aeromonas sobria</i>                | <i>Aeromonas</i>         | Aeromonadaceae      | 0.0 | 0.0 |
| <i>Bacillus lehensis</i>               | <i>Bacillus</i>          | Bacillaceae         | 0.0 | 0.0 |
| <i>Ralstonia solanacearum</i>          | <i>Ralstonia</i>         | Burkholderiaceae    | 0.0 | 0.0 |
| <i>Citrobacter</i> sp. FPO3            | <i>Citrobacter</i>       | Enterobacteriaceae  | 0.0 | 0.0 |
| <i>Citrobacter</i> sp. I91-3           | <i>Citrobacter</i>       | Enterobacteriaceae  | 0.0 | 0.0 |
| <i>Erwinia amylovora</i>               | <i>Erwinia</i>           | Enterobacteriaceae  | 0.0 | 0.0 |
| <i>Klebsiella milletis</i>             | <i>Klebsiella</i>        | Enterobacteriaceae  | 0.0 | 0.0 |
| <i>Salmonella bongori</i>              | <i>Salmonella</i>        | Enterobacteriaceae  | 0.0 | 0.0 |
| <i>Serratia grimesii</i>               | <i>Serratia</i>          | Enterobacteriaceae  | 0.0 | 0.0 |
| <i>Yersinia pestis</i>                 | <i>Yersinia</i>          | Enterobacteriaceae  | 0.0 | 0.0 |
| *                                      |                          | Enterobacteriaceae  | 0.0 | 0.0 |
| <i>Lactobacillus brevis</i>            | <i>Lactobacillus</i>     | Lactobacillaceae    | 0.0 | 0.0 |
| <i>Kocuria</i> sp. starX               | <i>Kocuria</i>           | Micrococcaceae      | 0.0 | 0.0 |

|                                              |                     |                       |     |     |
|----------------------------------------------|---------------------|-----------------------|-----|-----|
| Acinetobacter sp. 26                         | Acinetobacter       | Moraxellaceae         | 0.0 | 0.0 |
| Peptoclostridium difficile                   | Peptoclostridium    | Peptostreptococcaceae | 0.0 | 0.0 |
| Sorangium cellulosum                         | Sorangium           | Polyangiaceae         | 0.0 | 0.0 |
| Pseudomonas sp. NSi14                        | Pseudomonas         | Pseudomonadaceae      | 0.0 | 0.0 |
| Synergistetes oral clone 03 5 D05            |                     |                       | 0.0 | 0.0 |
| bacterium EBAD26                             |                     |                       | 0.0 | 0.0 |
| bacterium NLAE-zl-G351                       |                     |                       | 0.0 | 0.0 |
| rumen bacterium enrichment culture clone Y74 |                     |                       | 0.0 | 0.0 |
| unidentified marine bacterioplankton         |                     |                       | 0.0 | 0.0 |
| Escherichia albertii                         | Escherichia         | Enterobacteriaceae    | 0.0 | 0.0 |
| Mobiluncus curtisii                          | Mobiluncus          | Actinomycetaceae      | 0.0 | 0.0 |
| *                                            | Caulobacter         | Caulobacteraceae      | 0.0 | 0.0 |
| Methylothermobacter versatilis               | Methylothermobacter | Methylophilaceae      | 0.0 | 0.0 |
| Propionibacterium sp. KPL1849                | Propionibacterium   | Propionibacteriaceae  | 0.0 | 0.0 |
| bacterium EBAD25                             |                     |                       | 0.0 | 0.0 |
| Bacillus sp. Pc3                             | Bacillus            | Bacillaceae           | 0.0 | 0.0 |
| Acinetobacter sp. EVA14                      | Acinetobacter       | Moraxellaceae         | 0.0 | 0.0 |
| Agrobacterium sp.                            | Agrobacterium       | Rhizobiaceae          | 0.0 | 0.0 |
| Alistipes shahii                             | Alistipes           | Rikenellaceae         | 0.0 | 0.0 |
| *                                            | Thermus             | Thermaceae            | 0.0 | 0.0 |
| *                                            | Methylobacterium    |                       | 0.0 | 0.0 |
| butyrate-producing bacterium SSC/2           |                     |                       | 0.0 | 0.0 |
| Escherichia fergusonii                       | Escherichia         | Enterobacteriaceae    | 0.0 | 0.0 |
| Enterobacter sp. Ni15                        | Enterobacter        | Enterobacteriaceae    | 0.0 | 0.0 |
| Capnocytophaga ochracea                      | Capnocytophaga      | Flavobacteriaceae     | 0.0 | 0.0 |
| Thauera sp. 6NLG                             | Thauera             | Rhodocyclaceae        | 0.0 | 0.0 |
| Desulfovibrio alaskensis                     | Desulfovibrio       | Desulfovibrionaceae   | 0.0 | 0.0 |
| Variovorax sp. Alb14                         | Variovorax          | Comamonadaceae        | 0.0 | 0.0 |
| *                                            | Shigella            | Enterobacteriaceae    | 0.0 | 0.0 |
| *                                            | *                   | Micromonosporaceae    | 0.0 | 0.0 |
| *                                            | Micromonospora      | Micromonosporaceae    | 0.0 | 0.0 |
| Thermobifida fusca                           | Thermobifida        | Nocardiopsaceae       | 0.0 | 0.0 |
| Turneriella parva                            | Turneriella         | Leptospiraceae        | 0.0 | 0.0 |
| [Clostridium] sticklandii                    | Peptoclostridium    | Peptostreptococcaceae | 0.0 | 0.0 |
| Acinetobacter sp. Ooi24                      | Acinetobacter       | Moraxellaceae         | 0.0 | 0.0 |
| Ochrobactrum sp. SJY1                        | Ochrobactrum        | Brucellaceae          | 0.0 | 0.0 |
| Carnobacterium sp. WN1359                    | Carnobacterium      | Carnobacteriaceae     | 0.0 | 0.0 |
| Iamia majanohamensis                         | Iamia               | Iamiaceae             | 0.0 | 0.0 |
| Saccharomonospora viridis                    | Saccharomonospora   | Pseudonocardiaceae    | 0.0 | 0.0 |
| Rhizobium sp.                                | Rhizobium           | Rhizobiaceae          | 0.0 | 0.0 |
| Staphylococcus sp. CDC3                      | Staphylococcus      | Staphylococcaceae     | 0.0 | 0.0 |



|                                     |                   |                        |     |     |
|-------------------------------------|-------------------|------------------------|-----|-----|
| Shigella sonnei                     | Shigella          | Enterobacteriaceae     | 0.0 | 0.0 |
| Pseudomonas syringae                | Pseudomonas       | Pseudomonadaceae       | 0.0 | 0.0 |
| Burkholderia vietnamiensis          | Burkholderia      | Burkholderiaceae       | 0.0 | 0.0 |
| Shigella boydii                     | Shigella          | Enterobacteriaceae     | 0.0 | 0.0 |
| Bacillus weihenstephanensis         | Bacillus          | Bacillaceae            | 0.0 | 0.0 |
| Erythrobacter litoralis             | Erythrobacter     | Erythrobacteraceae     | 0.0 | 0.0 |
| Pseudoalteromonas haloplanktis      | Pseudoalteromonas | Pseudoalteromonadaceae | 0.0 | 0.0 |
| Pseudomonas sp. FG1182              | Pseudomonas       | Pseudomonadaceae       | 0.0 | 0.0 |
| *                                   | Rhizobium         | Rhizobiaceae           | 0.0 | 0.0 |
| *                                   | Rickettsia        | Rickettsiaceae         | 0.0 | 0.0 |
| Sphingobium yanoikuyae              | Sphingobium       | Sphingomonadaceae      | 0.0 | 0.0 |
| Stenotrophomonas rhizophila         | Stenotrophomonas  | Xanthomonadaceae       | 0.0 | 0.0 |
| *                                   | Leuconostoc       | Leuconostocaceae       | 0.0 | 0.0 |
| Aquicola tertiarycarbonis           | Aquicola          |                        | 0.0 | 0.0 |
| Nocardiopsis dassonvillei           | Nocardiopsis      | Nocardiopsaceae        | 0.0 | 0.0 |
| Carnobacterium maltaromaticum       | Carnobacterium    | Carnobacteriaceae      | 0.0 | 0.0 |
| *                                   | Haemophilus       | Pasteurellaceae        | 0.0 | 0.0 |
| Bordetella parapertussis            | Bordetella        | Alcaligenaceae         | 0.0 | 0.0 |
| *                                   | Dietzia           | Dietziaceae            | 0.0 | 0.0 |
| Shewanella sp. W3-18-1              | Shewanella        | Shewanellaceae         | 0.0 | 0.0 |
| Sphingomonas sp. NP5                | Sphingomonas      | Sphingomonadaceae      | 0.0 | 0.0 |
| Staphylococcus gallinarum           | Staphylococcus    | Staphylococcaceae      | 0.0 | 0.0 |
| Micavibrio aeruginosavorus          | Micavibrio        |                        | 0.0 | 0.0 |
| Paracoccus denitrificans            | Paracoccus        | Rhodobacteraceae       | 0.0 | 0.0 |
| [Cellvibrio] gilvus                 | Cellulomonas      | Cellulomonadaceae      | 0.0 | 0.0 |
| Corynebacterium jeikeium            | Corynebacterium   | Corynebacteriaceae     | 0.0 | 0.0 |
| *                                   | *                 | Staphylococcaceae      | 0.0 | 0.0 |
| Meiothermus silvanus                | Meiothermus       | Thermaceae             | 0.0 | 0.0 |
| Asticcacaulis excentricus           | Asticcacaulis     | Caulobacteraceae       | 0.0 | 0.0 |
| *                                   | Atopobium         | Coriobacteriaceae      | 0.0 | 0.0 |
| Streptococcus constellatus          | Streptococcus     | Streptococcaceae       | 0.0 | 0.0 |
| Microcystis aeruginosa              | Microcystis       |                        | 0.0 | 0.0 |
| agricultural soil bacterium SC-I-13 |                   |                        | 0.0 | 0.0 |
| [Ruminococcus] obeum                | Blautia           | Lachnospiraceae        | 0.0 | 0.0 |
| Thermus thermophilus                | Thermus           | Thermaceae             | 0.0 | 0.0 |
| Shigella flexneri                   | Shigella          | Enterobacteriaceae     | 0.0 | 0.0 |
| *                                   | Mycobacterium     | Mycobacteriaceae       | 0.0 | 0.0 |
| Pseudomonas savastanoi              | Pseudomonas       | Pseudomonadaceae       | 0.0 | 0.0 |
| Staphylococcus capitis              | Staphylococcus    | Staphylococcaceae      | 0.0 | 0.0 |
| *                                   | Cupriavidus       | Burkholderiaceae       | 0.0 | 0.0 |
| Dyadobacter fermentans              | Dyadobacter       | Cytophagaceae          | 0.0 | 0.0 |

|                               |                      |                    |     |     |
|-------------------------------|----------------------|--------------------|-----|-----|
| Dietzia sp. CQ4               | Dietzia              | Dietziaceae        | 0.0 | 0.0 |
| *                             | *                    | Methylophilaceae   | 0.0 | 0.0 |
| *                             | Neisseria            | Neisseriaceae      | 0.0 | 0.0 |
| Corynebacterium aurimucosum   | Corynebacterium      | Corynebacteriaceae | 0.0 | 0.0 |
| *                             |                      |                    | 0.0 | 0.0 |
| Pseudomonas fulva             | Pseudomonas          | Pseudomonadaceae   | 0.0 | 0.0 |
| Chromohalobacter salexigens   | Chromohalobacter     | Halomonadaceae     | 0.0 | 0.0 |
| Brevundimonas diminuta        | Brevundimonas        | Caulobacteraceae   | 0.0 | 0.0 |
| Streptococcus lutetiensis     | Streptococcus        | Streptococcaceae   | 0.0 | 0.0 |
| Bordetella petrii             | Bordetella           | Alcaligenaceae     | 0.0 | 0.0 |
| Erythrobacter sp. JP13.1      | Erythrobacter        | Erythrobacteraceae | 0.0 | 0.0 |
| Methylobacillus glycogenes    | Methylobacillus      | Methylophilaceae   | 0.0 | 0.0 |
| Candidatus Rhodoluna ladicola | Candidatus Rhodoluna | Microbacteriaceae  | 0.0 | 0.0 |
| Arthrobacter sp. JBH1         | Arthrobacter         | Micrococcaceae     | 0.0 | 0.0 |
| Aggregatibacter aphrophilus   | Aggregatibacter      | Pasteurellaceae    | 0.0 | 0.0 |
| Thauera sp. B4                | Thauera              | Rhodocyclaceae     | 0.0 | 0.0 |
| Lysobacter dokdonensis        | Lysobacter           | Xanthomonadaceae   | 0.0 | 0.0 |
| Clostridiales genomosp. BVAB3 |                      |                    | 0.0 | 0.0 |
| Streptococcus sp. I-G2        | Streptococcus        | Streptococcaceae   | 0.0 | 0.0 |
| Pseudomonas mandelii          | Pseudomonas          | Pseudomonadaceae   | 0.0 | 0.0 |
| Bradyrhizobium sp. S23321     | Bradyrhizobium       | Bradyrhizobiaceae  | 0.0 | 0.0 |
| Phenylobacterium zucineum     | Phenylobacterium     | Caulobacteraceae   | 0.0 | 0.0 |
| Pseudomonas mosselii          | Pseudomonas          | Pseudomonadaceae   | 0.0 | 0.0 |
| Staphylococcus lugdunensis    | Staphylococcus       | Staphylococcaceae  | 0.0 | 0.0 |
| Proteus mirabilis             | Proteus              | Enterobacteriaceae | 0.0 | 0.0 |
| *                             | *                    | Neisseriaceae      | 0.0 | 0.0 |
| Arthrobacter sp. J3-40        | Arthrobacter         | Micrococcaceae     | 0.0 | 0.0 |
| *                             | Pantoea              | Enterobacteriaceae | 0.0 | 0.0 |
| Corynebacterium efficiens     | Corynebacterium      | Corynebacteriaceae | 0.0 | 0.0 |
| *                             | Halomonas            | Halomonadaceae     | 0.0 | 0.0 |
| Trueperella pyogenes          | Trueperella          | Actinomycetaceae   | 0.0 | 0.0 |
| Streptomyces coelicolor       | Streptomyces         | Streptomycetaceae  | 0.0 | 0.0 |
| Kocuria rhizophila            | Kocuria              | Micrococcaceae     | 0.0 | 0.0 |
| Bacillus cereus               | Bacillus             | Bacillaceae        | 0.0 | 0.0 |
| Tannerella forsythia          | Tannerella           | Porphyromonadaceae | 0.0 | 0.0 |
| *                             | Alkalibacterium      | Carnobacteriaceae  | 0.0 | 0.0 |
| Atopobium parvulum            | Atopobium            | Coriobacteriaceae  | 0.0 | 0.0 |
| Serinicoccus profundi         | Serinicoccus         | Intrasporangiaceae | 0.0 | 0.0 |
| *                             | Leptotrichia         | Leptotrichiaceae   | 0.0 | 0.0 |
| *                             | *                    | Planococcaceae     | 0.0 | 0.0 |
| Planomicrobium okeanokoites   | Planomicrobium       | Planococcaceae     | 0.0 | 0.0 |

|                                             |                    |                      |     |     |
|---------------------------------------------|--------------------|----------------------|-----|-----|
| Jannaschia sp. CCS1                         | Jannaschia         | Rhodobacteraceae     | 0.0 | 0.0 |
| Paracoccus aestuarii                        | Paracoccus         | Rhodobacteraceae     | 0.0 | 0.0 |
| Rhodobacter blasticus                       | Rhodobacter        | Rhodobacteraceae     | 0.0 | 0.0 |
| Agrobacterium tumefaciens                   | Agrobacterium      | Rhizobiaceae         | 0.0 | 0.0 |
| Shewanella sp. ANA-3                        | Shewanella         | Shewanellaceae       | 0.0 | 0.0 |
| Pseudomonas cichorii                        | Pseudomonas        | Pseudomonadaceae     | 0.0 | 0.0 |
| Halomonas sp. A3H3                          | Halomonas          | Halomonadaceae       | 0.0 | 0.0 |
| Serratia liquefaciens                       | Serratia           | Enterobacteriaceae   | 0.0 | 0.0 |
| Sphingopyxis alaskensis                     | Sphingopyxis       | Sphingomonadaceae    | 0.0 | 0.0 |
| *                                           | Brevundimonas      | Caulobacteraceae     | 0.0 | 0.0 |
| Deinococcus deserti                         | Deinococcus        | Deinococcaceae       | 0.0 | 0.0 |
| Desulfovibrio vulgaris                      | Desulfovibrio      | Desulfovibrionaceae  | 0.0 | 0.0 |
| Propionibacterium sp. NTS31307302           | Propionibacterium  | Propionibacteriaceae | 0.0 | 0.0 |
| Paracoccus alcaliphilus                     | Paracoccus         | Rhodobacteraceae     | 0.0 | 0.0 |
| Vibrio parahaemolyticus                     | Vibrio             | Vibrionaceae         | 0.0 | 0.0 |
| Candidatus Saccharibacteria oral taxon TM7x |                    |                      | 0.0 | 0.0 |
| Geitlerinema sp. PCC 7407                   | Geitlerinema       |                      | 0.0 | 0.0 |
| *                                           | Actinomyces        | Actinomycetaceae     | 0.0 | 0.0 |
| Brevundimonas vesicularis                   | Brevundimonas      | Caulobacteraceae     | 0.0 | 0.0 |
| Acinetobacter sp. YS0810                    | Acinetobacter      | Moraxellaceae        | 0.0 | 0.0 |
| *                                           | Prevotella         | Prevotellaceae       | 0.0 | 0.0 |
| Methyloceanibacter caenitepidi              | Methyloceanibacter |                      | 0.0 | 0.0 |
| Leuconostoc citreum                         | Leuconostoc        | Leuconostocaceae     | 0.0 | 0.0 |
| *                                           | Bacteroides        | Bacteroidaceae       | 0.0 | 0.0 |
| Pseudomonas alcaligenes                     | Pseudomonas        | Pseudomonadaceae     | 0.0 | 0.0 |
| Methylibium petroleiphilum                  | Methylibium        |                      | 0.0 | 0.0 |
| Moraxella catarrhalis                       | Moraxella          | Moraxellaceae        | 0.0 | 0.0 |
| Sphingopyxis sp. Kp5.2                      | Sphingopyxis       | Sphingomonadaceae    | 0.0 | 0.0 |
| Pandoraea apista                            | Pandoraea          | Burkholderiaceae     | 0.0 | 0.0 |
| *                                           | Cellulomonas       | Cellulomonadaceae    | 0.0 | 0.0 |
| Olsenella uli                               | Olsenella          | Coriobacteriaceae    | 0.0 | 0.0 |
| Acinetobacter oleivorans                    | Acinetobacter      | Moraxellaceae        | 0.0 | 0.0 |
| Sphingomonas sp. 133                        | Sphingomonas       | Sphingomonadaceae    | 0.0 | 0.0 |
| Meiothermus taiwanensis                     | Meiothermus        | Thermaceae           | 0.0 | 0.0 |
| Deinococcus geothermalis                    | Deinococcus        | Deinococcaceae       | 0.0 | 0.0 |
| Lactobacillus sanfranciscensis              | Lactobacillus      | Lactobacillaceae     | 0.0 | 0.0 |
| Acinetobacter sp. LUH5605                   | Acinetobacter      | Moraxellaceae        | 0.0 | 0.0 |
| Staphylococcus simulans                     | Staphylococcus     | Staphylococcaceae    | 0.0 | 0.0 |
| Arsenophonus nasoniae                       | Arsenophonus       | Enterobacteriaceae   | 0.0 | 0.0 |
| Buchnera aphidicola                         | Buchnera           | Enterobacteriaceae   | 0.0 | 0.0 |
| Weissella koreensis                         | Weissella          | Leuconostocaceae     | 0.0 | 0.0 |

|                               |                  |                     |     |     |
|-------------------------------|------------------|---------------------|-----|-----|
| Psychrobacter sp. G           | Psychrobacter    | Moraxellaceae       | 0.0 | 0.0 |
| Amycolobicoccus subflavus     | Amycolobicoccus  | Mycobacteriaceae    | 0.0 | 0.0 |
| Staphylococcus hyicus         | Staphylococcus   | Staphylococcaceae   | 0.0 | 0.0 |
| Morganella morganii           | Morganella       | Enterobacteriaceae  | 0.0 | 0.0 |
| Kyrpidia tusciae              | Kyrpidia         | Alicyclobacillaceae | 0.0 | 0.0 |
| Ramlibacter tataouinensis     | Ramlibacter      | Comamonadaceae      | 0.0 | 0.0 |
| Weeksella virosa              | Weeksella        | Flavobacteriaceae   | 0.0 | 0.0 |
| Acinetobacter junii           | Acinetobacter    | Moraxellaceae       | 0.0 | 0.0 |
| Acinetobacter sp. 26B2        | Acinetobacter    | Moraxellaceae       | 0.0 | 0.0 |
| Mycobacterium abscessus       | Mycobacterium    | Mycobacteriaceae    | 0.0 | 0.0 |
| Neisseria gonorrhoeae         | Neisseria        | Neisseriaceae       | 0.0 | 0.0 |
| Sphingomonas wittichii        | Sphingomonas     | Sphingomonadaceae   | 0.0 | 0.0 |
| Bacteroides dorei             | Bacteroides      | Bacteroidaceae      | 0.0 | 0.0 |
| Corynebacterium halotolerans  | Corynebacterium  | Corynebacteriaceae  | 0.0 | 0.0 |
| Pelomonas aquatica            | Pelomonas        | Comamonadaceae      | 0.0 | 0.0 |
| Janibacter sp. TYM3221        | Janibacter       | Intrasporangiaceae  | 0.0 | 0.0 |
| *                             | Arthrobacter     | Micrococcaceae      | 0.0 | 0.0 |
| Mycobacterium gordonae        | Mycobacterium    | Mycobacteriaceae    | 0.0 | 0.0 |
| Pimelobacter simplex          | Pimelobacter     | Nocardoidaceae      | 0.0 | 0.0 |
| Pseudomonas sp. OM2164        | Pseudomonas      | Pseudomonadaceae    | 0.0 | 0.0 |
| Streptomyces albus            | Streptomyces     | Streptomycetaceae   | 0.0 | 0.0 |
| Halomonas halocynthiae        | Halomonas        | Halomonadaceae      | 0.0 | 0.0 |
| Nitrosomonas sp. AL212        | Nitrosomonas     | Nitrosomonadaceae   | 0.0 | 0.0 |
| Sphingobacterium mizutaii     | Sphingobacterium | Sphingobacteriaceae | 0.0 | 0.0 |
| Vibrio cholerae               | Vibrio           | Vibrionaceae        | 0.0 | 0.0 |
| Rickettsia felis              | Rickettsia       | Rickettsiaceae      | 0.0 | 0.0 |
| *                             | *                | Moraxellaceae       | 0.0 | 0.0 |
| Bacteroidetes bacterium WD317 |                  |                     | 0.0 | 0.0 |
| Corynebacterium casei         | Corynebacterium  | Corynebacteriaceae  | 0.0 | 0.0 |
| Corynebacterium marinum       | Corynebacterium  | Corynebacteriaceae  | 0.0 | 0.0 |
| *                             | *                | Flavobacteriaceae   | 0.0 | 0.0 |
| Caulobacter segnis            | Caulobacter      | Caulobacteraceae    | 0.0 | 0.0 |
| Lactobacillus gasseri         | Lactobacillus    | Lactobacillaceae    | 0.0 | 0.0 |
| *                             | Meiothermus      | Thermaceae          | 0.0 | 0.0 |
| Rhizobium sp. NT-26           | Rhizobium        | Rhizobiaceae        | 0.0 | 0.0 |
| Bacillus coagulans            | Bacillus         | Bacillaceae         | 0.0 | 0.0 |
| *                             | Sphingomonas     | Sphingomonadaceae   | 0.0 | 0.0 |
| *                             | Brevibacterium   | Brevibacteriaceae   | 0.0 | 0.0 |
| Nitrosomonas europaea         | Nitrosomonas     | Nitrosomonadaceae   | 0.0 | 0.0 |
| Pseudomonas alkylphenolia     | Pseudomonas      | Pseudomonadaceae    | 0.0 | 0.0 |
| Terrabacter sp. DBF63         | Terrabacter      | Intrasporangiaceae  | 0.0 | 0.0 |

|                                      |                  |                     |     |     |
|--------------------------------------|------------------|---------------------|-----|-----|
| beta proteobacterium CB              |                  |                     | 0.0 | 0.0 |
| Moraxella ovis                       | Moraxella        | Moraxellaceae       | 0.0 | 0.0 |
| Shewanella baltica                   | Shewanella       | Shewanellaceae      | 0.0 | 0.0 |
| Mycobacterium gilvum                 | Mycobacterium    | Mycobacteriaceae    | 0.0 | 0.0 |
| *                                    | Exiguobacterium  |                     | 0.0 | 0.0 |
| *                                    | Ochrobactrum     | Brucellaceae        | 0.0 | 0.0 |
| Geodermatophilus obscurus            | Geodermatophilus | Geodermatophilaceae | 0.0 | 0.0 |
| *                                    | Devosia          | Hyphomicrobiaceae   | 0.0 | 0.0 |
| Moraxella osloensis                  | Moraxella        | Moraxellaceae       | 0.0 | 0.0 |
| Exiguobacterium sp. 11-28            | Exiguobacterium  |                     | 0.0 | 0.0 |
| Nocardioides sp. JS614               | Nocardioides     | Nocardioidaceae     | 0.0 | 0.0 |
| Nocardioides sp. USM2                | Nocardioides     | Nocardioidaceae     | 0.0 | 0.0 |
| Burkholderia gladioli                | Burkholderia     | Burkholderiaceae    | 0.0 | 0.0 |
| Renibacterium salmoninarum           | Renibacterium    | Micrococcaceae      | 0.0 | 0.0 |
| Pseudomonas syringae group genom     | Pseudomonas      | Pseudomonadaceae    | 0.0 | 0.0 |
| Bifidobacterium pseudolongum         | Bifidobacterium  | Bifidobacteriaceae  | 0.0 | 0.0 |
| toluene-degrading bacterium UCR 021t |                  |                     | 0.0 | 0.0 |
| Corynebacterium imitans              | Corynebacterium  | Corynebacteriaceae  | 0.0 | 0.0 |
| Corynebacterium callunae             | Corynebacterium  | Corynebacteriaceae  | 0.0 | 0.0 |
| Bosea sp. WAO                        | Bosea            | Bradyrhizobiaceae   | 0.0 | 0.0 |
| Xanthobacter autotrophicus           | Xanthobacter     | Xanthobacteraceae   | 0.0 | 0.0 |
| Corynebacterium diphtheriae          | Corynebacterium  | Corynebacteriaceae  | 0.0 | 0.0 |
| Bacteroides thetaiotaomicron         | Bacteroides      | Bacteroidaceae      | 0.0 | 0.0 |
| Caulobacter vibrioides               | Caulobacter      | Caulobacteraceae    | 0.0 | 0.0 |
| *                                    | *                | Pasteurellaceae     | 0.0 | 0.0 |
| Fingoldia magna                      | Fingoldia        | Peptoniphilaceae    | 0.0 | 0.0 |
| Anaerococcus prevotii                | Anaerococcus     | Peptoniphilaceae    | 0.0 | 0.0 |
| Azorhizobium caulinodans             | Azorhizobium     | Xanthobacteraceae   | 0.0 | 0.0 |
| Erysipelothrix rhusiopathiae         | Erysipelothrix   | Erysipelotrichaceae | 0.0 | 0.0 |
| Porphyromonas asaccharolytica        | Porphyromonas    | Porphyromonadaceae  | 0.0 | 0.0 |
| *                                    | Sphingopyxis     | Sphingomonadaceae   | 0.0 | 0.0 |
| Eubacterium rectale                  | Eubacterium      | Eubacteriaceae      | 0.0 | 0.0 |
| Acinetobacter venetianus             | Acinetobacter    | Moraxellaceae       | 0.0 | 0.0 |
| Variovorax paradoxus                 | Variovorax       | Comamonadaceae      | 0.0 | 0.0 |
| Acinetobacter sp. ED45-25            | Acinetobacter    | Moraxellaceae       | 0.0 | 0.0 |
| Bradyrhizobium diazoefficiens        | Bradyrhizobium   | Bradyrhizobiaceae   | 0.0 | 0.0 |
| Bradyrhizobium japonicum             | Bradyrhizobium   | Bradyrhizobiaceae   | 0.0 | 0.0 |
| Megamonas hypermegale                | Megamonas        | Veillonellaceae     | 0.0 | 0.0 |
| *                                    | Methylobacillus  | Methylophilaceae    | 0.0 | 0.0 |
| Nocardiopsis alba                    | Nocardiopsis     | Nocardiopsaceae     | 0.0 | 0.0 |
| Modestobacter marinus                | Modestobacter    | Geodermatophilaceae | 0.0 | 0.0 |

|                                     |                         |                     |     |     |
|-------------------------------------|-------------------------|---------------------|-----|-----|
| <i>Corynebacterium doosanense</i>   | <i>Corynebacterium</i>  | Corynebacteriaceae  | 0.0 | 0.0 |
| <i>Blastococcus saxobidens</i>      | <i>Blastococcus</i>     | Geodermatophilaceae | 0.0 | 0.0 |
| <i>Anoxybacillus flavithermus</i>   | <i>Anoxybacillus</i>    | Bacillaceae         | 0.0 | 0.0 |
| <i>Aeromonas caviae</i>             | <i>Aeromonas</i>        | Aeromonadaceae      | 0.0 | 0.0 |
| <i>Bacillus subtilis</i>            | <i>Bacillus</i>         | Bacillaceae         | 0.0 | 0.0 |
| <i>Elizabethkingia anophelis</i>    | <i>Elizabethkingia</i>  | Flavobacteriaceae   | 0.0 | 0.0 |
| <i>Staphylococcus hominis</i>       | <i>Staphylococcus</i>   | Staphylococcaceae   | 0.0 | 0.0 |
| <i>Ruminococcus bicirculans</i>     | <i>Ruminococcus</i>     | Ruminococcaceae     | 0.0 | 0.0 |
| <i>Paracoccus marcusii</i>          | <i>Paracoccus</i>       | Rhodobacteraceae    | 0.0 | 0.0 |
| *                                   | <i>Psychrobacter</i>    | Moraxellaceae       | 0.0 | 0.0 |
| <i>Sphingomonas sanxanigenens</i>   | <i>Sphingomonas</i>     | Sphingomonadaceae   | 0.0 | 0.0 |
| *                                   | *                       | Leuconostocaceae    | 0.0 | 0.0 |
| *                                   | *                       | Burkholderiaceae    | 0.0 | 0.0 |
| <i>Bacteroides vulgatus</i>         | <i>Bacteroides</i>      | Bacteroidaceae      | 0.0 | 0.0 |
| <i>Rhodopseudomonas palustris</i>   | <i>Rhodopseudomonas</i> | Bradyrhizobiaceae   | 0.0 | 0.0 |
| <i>Pantoea agglomerans</i>          | <i>Pantoea</i>          | Enterobacteriaceae  | 0.0 | 0.0 |
| *                                   | *                       | Sphingomonadaceae   | 0.0 | 0.0 |
| <i>Mycobacterium kansasii</i>       | <i>Mycobacterium</i>    | Mycobacteriaceae    | 0.0 | 0.0 |
| *                                   | <i>Streptomyces</i>     | Streptomycetaceae   | 0.0 | 0.0 |
| <i>Enterococcus faecalis</i>        | <i>Enterococcus</i>     | Enterococcaceae     | 0.0 | 0.0 |
| <i>Acinetobacter</i> sp. NFM2       | <i>Acinetobacter</i>    | Moraxellaceae       | 0.0 | 0.0 |
| <i>Shewanella putrefaciens</i>      | <i>Shewanella</i>       | Shewanellaceae      | 0.0 | 0.0 |
| <i>Bifidobacterium adolescentis</i> | <i>Bifidobacterium</i>  | Bifidobacteriaceae  | 0.0 | 0.0 |
| *                                   | <i>Bifidobacterium</i>  | Bifidobacteriaceae  | 0.0 | 0.0 |
| <i>Porphyromonas gingivalis</i>     | <i>Porphyromonas</i>    | Porphyromonadaceae  | 0.0 | 0.0 |
| <i>Neisseria meningitidis</i>       | <i>Neisseria</i>        | Neisseriaceae       | 0.0 | 0.0 |
| <i>Rhodococcus pyridinivorans</i>   | <i>Rhodococcus</i>      | Nocardiaceae        | 0.0 | 0.0 |
| <i>Aeromonas salmonicida</i>        | <i>Aeromonas</i>        | Aeromonadaceae      | 0.0 | 0.0 |
| <i>Planococcus</i> sp. PAMC 21323   | <i>Planococcus</i>      | Planococcaceae      | 0.0 | 0.0 |
| <i>Pseudomonas simiae</i>           | <i>Pseudomonas</i>      | Pseudomonadaceae    | 0.0 | 0.0 |
| <i>Faecalibacterium prausnitzii</i> | <i>Faecalibacterium</i> | Ruminococcaceae     | 0.0 | 0.0 |
| <i>Acinetobacter lwoffii</i>        | <i>Acinetobacter</i>    | Moraxellaceae       | 0.0 | 0.0 |
| <i>Exiguobacterium</i> sp. N139     | <i>Exiguobacterium</i>  |                     | 0.0 | 0.0 |
| <i>Streptococcus anginosus</i>      | <i>Streptococcus</i>    | Streptococcaceae    | 0.0 | 0.0 |
| <i>Thauera</i> sp. MZ1T             | <i>Thauera</i>          | Rhodocyclaceae      | 0.0 | 0.0 |
| *                                   | <i>Shewanella</i>       | Shewanellaceae      | 0.0 | 0.0 |
| *                                   | <i>Aeromonas</i>        | Aeromonadaceae      | 0.0 | 0.0 |
| <i>Staphylococcus aureus</i>        | <i>Staphylococcus</i>   | Staphylococcaceae   | 0.0 | 0.0 |
| <i>Aeromonas hydrophila</i>         | <i>Aeromonas</i>        | Aeromonadaceae      | 0.0 | 0.0 |
| <i>Aeromonas veronii</i>            | <i>Aeromonas</i>        | Aeromonadaceae      | 0.0 | 0.0 |
| <i>Bifidobacterium breve</i>        | <i>Bifidobacterium</i>  | Bifidobacteriaceae  | 0.0 | 0.0 |

|                     |          |             |     |     |
|---------------------|----------|-------------|-----|-----|
| Bacillus megaterium | Bacillus | Bacillaceae | 0.0 | 0.0 |
|---------------------|----------|-------------|-----|-----|
