# Supplementary material
Source: PubMed Central journal article supplement (PMC6251619)
Supplement: piw066_suppl_supplementary_table_5.pdf [file piw066_suppl_supplementary_table_5.pdf]

**Supplementary Table 5.** Number of reads from DNA mNGS library aligning to fungal and parasitic sequences. Results are shown from both the patient's sample, NTC, and the PC sample.

\*re-classified to a higher taxonomic rank because reads aligned equally well to multiple different organisms that shared the same species, genus or family

Abbreviations: NTC, no template control; PC, positive control; CSF, cerebrospinal fluid; mNGS, metagenomic next-generation sequencing

| species                                | genus                   | family               | Readcount |         |                 |
|----------------------------------------|-------------------------|----------------------|-----------|---------|-----------------|
|                                        |                         |                      | DNA NTC   | DNA PC  | DNA Patient CSF |
| <i>Cryptococcus neoformans</i>         | Filobasidiella          | Tremellaceae         | 0         | 104,135 | 0               |
| <i>Aspergillus niger</i>               | <i>Aspergillus</i>      | Aspergillaceae       | 8         | 21,725  | 0               |
| <i>Toxoplasma gondii</i>               | <i>Toxoplasma</i>       | Sarcocystidae        | 0         | 9,228   | 0               |
| *                                      | Filobasidiella          | Tremellaceae         | 0         | 519     | 0               |
| *                                      | *                       | Sarcocystidae        | 0         | 266     | 0               |
| <i>Neospora caninum</i>                | <i>Neospora</i>         | Sarcocystidae        | 0         | 50      | 0               |
| <i>Hammondia triffittae</i>            | <i>Hammondia</i>        | Sarcocystidae        | 0         | 24      | 0               |
| *                                      | *                       | Aspergillaceae       | 0         | 20      | 0               |
| *                                      | <i>Hammondia</i>        | Sarcocystidae        | 0         | 20      | 0               |
| *                                      | <i>Aspergillus</i>      | Aspergillaceae       | 50        | 173     | 0               |
| <i>Hammondia hammondi</i>              | <i>Hammondia</i>        | Sarcocystidae        | 7         | 20      | 0               |
| <i>Aspergillus fumigatus</i>           | <i>Aspergillus</i>      | Aspergillaceae       | 0         | 15      | 0               |
| <i>Aspergillus awamori</i>             | <i>Aspergillus</i>      | Aspergillaceae       | 0         | 7       | 0               |
| <i>Bartheletia paradoxa</i>            | <i>Bartheletia</i>      | Bartheletiaceae      | 0         | 7       | 0               |
| <i>Cryptococcus gattii</i>             | Filobasidiella          | Tremellaceae         | 0         | 7       | 0               |
| <i>Aspergillus kawachii</i>            | <i>Aspergillus</i>      | Aspergillaceae       | 0         | 6       | 0               |
| <i>Spirometra erinaceieuropaei</i>     | <i>Spirometra</i>       | Diphyllobothriidae   | 3         | 5       | 3               |
| <i>Mucor racemosus</i>                 | <i>Mucor</i>            | Mucoraceae           | 0         | 5       | 0               |
| <i>Aspergillus oryzae</i>              | <i>Aspergillus</i>      | Aspergillaceae       | 0         | 4       | 0               |
| <i>Setosphaeria turcica</i>            | <i>Setosphaeria</i>     | Pleosporaceae        | 0         | 4       | 0               |
| <i>Caenorhabditis remanei</i>          | <i>Caenorhabditis</i>   | Rhabditidae          | 0         | 3       | 0               |
| <i>Aspergillus tubingensis</i>         | <i>Aspergillus</i>      | Aspergillaceae       | 0         | 3       | 0               |
| <i>Anisakis simplex</i>                | <i>Anisakis</i>         | Anisakidae           | 7         | 2       | 0               |
| <i>Penicillium solitum</i>             | <i>Penicillium</i>      | Aspergillaceae       | 0         | 1       | 0               |
| <i>Plectosphaerella</i> sp. 93 OA-2013 | <i>Plectosphaerella</i> | Plectosphaerellaceae | 0         | 1       | 0               |
| *                                      | *                       | Tremellaceae         | 0         | 1       | 0               |
| <i>Malassezia globosa</i>              | <i>Malassezia</i>       | Malasseziaceae       | 231       | 35      | 2               |
| <i>Gongylonema pulchrum</i>            | <i>Gongylonema</i>      | Gongylonematidae     | 27        | 4       | 0               |
| <i>Wallemia sebi</i>                   | <i>Wallemia</i>         |                      | 68        | 10      | 1               |

|                                      |                           |                      |       |     |    |
|--------------------------------------|---------------------------|----------------------|-------|-----|----|
| *                                    | *                         | *                    | 2,821 | 394 | 17 |
| <i>Candida parapsilosis</i>          | <i>Candida</i>            | Debaryomycetaceae    | 323   | 45  | 6  |
| <i>Elaeophora elaphi</i>             | <i>Elaeophora</i>         | Onchocercidae        | 77    | 10  | 1  |
| <i>Lichtheimia hongkongensis</i>     | <i>Lichtheimia</i>        | Lichtheimiaceae      | 70    | 6   | 0  |
| <i>Brugia timori</i>                 | <i>Brugia</i>             | Onchocercidae        | 117   | 3   | 0  |
| <i>Parastrongyloides trichosuri</i>  | <i>Parastrongyloides</i>  | Strongyloididae      | 293   | 5   | 1  |
| <i>Sordaria macrospora</i>           | <i>Sordaria</i>           | Sordariaceae         | 7     | 0   | 1  |
| <i>Bipolaris sorokiniana</i>         | <i>Bipolaris</i>          | Pleosporaceae        | 34    | 0   | 3  |
| <i>Malassezia restricta</i>          | <i>Malassezia</i>         | Malasseziaceae       | 1     | 0   | 0  |
| <i>Cladosporium oxysporum</i>        | <i>Cladosporium</i>       | Cladosporiaceae      | 1     | 0   | 0  |
| <i>Strongylocentrotus purpuratus</i> | <i>Strongylocentrotus</i> | Strongylocentrotidae | 5     | 0   | 0  |
| <i>Caenorhabditis elegans</i>        | <i>Caenorhabditis</i>     | Rhabditidae          | 5     | 0   | 0  |
| <i>Penicillium griseoroseum</i>      | <i>Penicillium</i>        | Aspergillaceae       | 7     | 0   | 0  |
| <i>Fusarium graminearum</i>          | <i>Fusarium</i>           | Nectriaceae          | 7     | 0   | 0  |
| <i>Leptosphaeria biglobosa</i>       | <i>Leptosphaeria</i>      | Leptosphaeriaceae    | 8     | 0   | 0  |
| <i>Chaetomium globosum</i>           | <i>Chaetomium</i>         | Chaetomiaceae        | 8     | 0   | 0  |
| <i>Myceliophthora thermophila</i>    | <i>Myceliophthora</i>     | Chaetomiaceae        | 8     | 0   | 0  |
| <i>Alternaria tenuissima</i>         | <i>Alternaria</i>         | Pleosporaceae        | 8     | 0   | 0  |
| *                                    | <i>Saccharomyces</i>      | Saccharomycetaceae   | 8     | 0   | 0  |
| <i>Aphanomyces euteiches</i>         | <i>Aphanomyces</i>        | Saprolegniaceae      | 8     | 0   | 0  |
| <i>Ophiostoma piliferum</i>          | <i>Ophiostoma</i>         | Ophiostomataceae     | 9     | 0   | 0  |
| <i>Rhodotorula taiwanensis</i>       | <i>Rhodotorula</i>        |                      | 9     | 0   | 0  |
| <i>Trichosporon domesticum</i>       | <i>Trichosporon</i>       |                      | 10    | 0   | 0  |
| <i>Phoma herbarum</i>                | <i>Phoma</i>              | Didymellaceae        | 12    | 0   | 0  |
| <i>Erysiphe alphitoides</i>          | <i>Erysiphe</i>           | Erysiphaceae         | 13    | 0   | 0  |
| *                                    | <i>Leptosphaeria</i>      | Leptosphaeriaceae    | 15    | 0   | 0  |
| <i>Zymoseptoria tritici</i>          | <i>Zymoseptoria</i>       | Mycosphaerellaceae   | 15    | 0   | 0  |
| <i>Debaryomyces hansenii</i>         | <i>Debaryomyces</i>       | Debaryomycetaceae    | 15    | 0   | 0  |
| <i>Alternaria alternata</i>          | <i>Alternaria</i>         | Pleosporaceae        | 16    | 0   | 0  |
| *                                    | <i>Phoma</i>              | Didymellaceae        | 17    | 0   | 0  |
| *                                    | <i>Umbilicaria</i>        | Umbilicariaceae      | 18    | 0   | 0  |
| *                                    | <i>Penicillium</i>        | Aspergillaceae       | 20    | 0   | 0  |
| <i>Wuchereria bancrofti</i>          | <i>Wuchereria</i>         | Onchocercidae        | 20    | 0   | 0  |
| <i>Cladosporium cladosporioides</i>  | <i>Cladosporium</i>       | Cladosporiaceae      | 20    | 0   | 0  |
| <i>Saccharomyces bayanus</i>         | <i>Saccharomyces</i>      | Saccharomycetaceae   | 20    | 0   | 0  |
| <i>Fusarium phaseoli</i>             | <i>Fusarium</i>           | Nectriaceae          | 21    | 0   | 0  |
| <i>Dasybranchus</i> sp. DH1          | <i>Dasybranchus</i>       | Capitellidae         | 23    | 0   | 0  |
| <i>Neofusicoccum parvum</i>          | <i>Neofusicoccum</i>      | Botryosphaeriaceae   | 30    | 0   | 0  |

|                      |              |                 |     |   |   |
|----------------------|--------------|-----------------|-----|---|---|
| *                    | Cladosporium | Cladosporiaceae | 30  | 0 | 0 |
| Penicillium rubens   | Penicillium  | Aspergillaceae  | 33  | 0 | 0 |
| Ustilago maydis      | Ustilago     | Ustilaginaceae  | 38  | 0 | 0 |
| Mucor circinelloides | Mucor        | Mucoraceae      | 68  | 0 | 0 |
| Albugo laibachii     | Albugo       | Albuginaceae    | 115 | 0 | 0 |
