# Supplementary material
Source: PubMed Central journal article supplement (PMC6251619)
Supplement: piw066_suppl_supplementary_table_6.pdf [file piw066_suppl_supplementary_table_6.pdf]

**Supplementary Table 6.** Fungal and parasitic taxa identified by mNGS using an RPM ratio metric

\*re-classified to a higher taxonomic rank because reads aligned equally well to multiple different organisms that shared the same species, genus or family

#positive result according to an RPM ratio  $\geq 10$ , where the RPM ratio = RPM(sample) / RPM(NTC)

\*re-classified to a higher taxonomic rank because reads aligned equally well to multiple different organisms that shared the same species, genus or family

Abbreviations: PC, positive control; CSF, cerebrospinal fluid; mNGS, metagenomic next-generation sequencing; RPM, reads per million

| species                     | genus          | family             | Normalized Reads Per million |                 |
|-----------------------------|----------------|--------------------|------------------------------|-----------------|
|                             |                |                    | DNA PC                       | DNA Patient CSF |
| Cryptococcus neoformans     | Filobasidiella | Tremellaceae       | 10,696.4 <sup>#</sup>        | 0.0             |
| Aspergillus niger           | Aspergillus    | Aspergillaceae     | 1567.5 <sup>#</sup>          | 0.0             |
| Toxoplasma gondii           | Toxoplasma     | Sarcocystidae      | 947.9 <sup>#</sup>           | 0.0             |
| *                           | Filobasidiella | Tremellaceae       | 53.3 <sup>#</sup>            | 0.0             |
| *                           | *              | Sarcocystidae      | 27.3 <sup>#</sup>            | 0.0             |
| Neospora caninum            | Neospora       | Sarcocystidae      | 5.1                          | 0.0             |
| Hammondia triffittae        | Hammondia      | Sarcocystidae      | 2.5                          | 0.0             |
| *                           | *              | Aspergillaceae     | 2.1                          | 0.0             |
| *                           | Hammondia      | Sarcocystidae      | 2.1                          | 0.0             |
| *                           | Aspergillus    | Aspergillaceae     | 2.0                          | 0.0             |
| Hammondia hammondi          | Hammondia      | Sarcocystidae      | 1.6                          | 0.0             |
| Aspergillus fumigatus       | Aspergillus    | Aspergillaceae     | 1.5                          | 0.0             |
| Aspergillus awamori         | Aspergillus    | Aspergillaceae     | 0.7                          | 0.0             |
| Bartheletia paradoxa        | Bartheletia    | Bartheletiaceae    | 0.7                          | 0.0             |
| Cryptococcus gattii         | Filobasidiella | Tremellaceae       | 0.7                          | 0.0             |
| Aspergillus kawachii        | Aspergillus    | Aspergillaceae     | 0.6                          | 0.0             |
| Spirometra erinaceieuropaei | Spirometra     | Diphyllobothriidae | 0.5                          | 0.2             |
| Mucor racemosus             | Mucor          | Mucoraceae         | 0.5                          | 0.0             |
| Aspergillus oryzae          | Aspergillus    | Aspergillaceae     | 0.4                          | 0.0             |
| Setosphaeria turcica        | Setosphaeria   | Pleosporaceae      | 0.4                          | 0.0             |
| Caenorhabditis remanei      | Caenorhabditis | Rhabditidae        | 0.3                          | 0.0             |
| Aspergillus tubingensis     | Aspergillus    | Aspergillaceae     | 0.3                          | 0.0             |
| Anisakis simplex            | Anisakis       | Anisakidae         | 0.2                          | 0.0             |
| Penicillium solitum         | Penicillium    | Aspergillaceae     | 0.1                          | 0.0             |

|                                 |                    |                      |     |     |
|---------------------------------|--------------------|----------------------|-----|-----|
| Plectosphaerella sp. 93 OA-2013 | Plectosphaerella   | Plectosphaerellaceae | 0.1 | 0.0 |
| *                               | *                  | Tremellaceae         | 0.1 | 0.0 |
| Malassezia globosa              | Malassezia         | Malasseziaceae       | 0.1 | 0.0 |
| Gongylonema pulchrum            | Gongylonema        | Gongylonematidae     | 0.1 | 0.0 |
| Wallemia sebi                   | Wallemia           |                      | 0.1 | 0.0 |
| *                               | *                  | *                    | 0.1 | 0.0 |
| Candida parapsilosis            | Candida            | Debaryomycetaceae    | 0.1 | 0.0 |
| Elaeophora elaphi               | Elaeophora         | Onchocercidae        | 0.1 | 0.0 |
| Lichtheimia hongkongensis       | Lichtheimia        | Lichtheimiaceae      | 0.0 | 0.0 |
| Brugia timori                   | Brugia             | Onchocercidae        | 0.0 | 0.0 |
| Parastrongyloides trichosuri    | Parastrongyloides  | Strongyloididae      | 0.0 | 0.0 |
| Sordaria macrospora             | Sordaria           | Sordariaceae         | 0.0 | 0.1 |
| Bipolaris sorokiniana           | Bipolaris          | Pleosporaceae        | 0.0 | 0.0 |
| Malassezia restricta            | Malassezia         | Malasseziaceae       | 0.0 | 0.0 |
| Cladosporium oxysporum          | Cladosporium       | Cladosporiaceae      | 0.0 | 0.0 |
| Strongylocentrotus purpuratus   | Strongylocentrotus | Strongylocentrotidae | 0.0 | 0.0 |
| Caenorhabditis elegans          | Caenorhabditis     | Rhabditidae          | 0.0 | 0.0 |
| Penicillium griseoroseum        | Penicillium        | Aspergillaceae       | 0.0 | 0.0 |
| Fusarium graminearum            | Fusarium           | Nectriaceae          | 0.0 | 0.0 |
| Leptosphaeria biglobosa         | Leptosphaeria      | Leptosphaeriaceae    | 0.0 | 0.0 |
| Chaetomium globosum             | Chaetomium         | Chaetomiaceae        | 0.0 | 0.0 |
| Myceliophthora thermophila      | Myceliophthora     | Chaetomiaceae        | 0.0 | 0.0 |
| Alternaria tenuissima           | Alternaria         | Pleosporaceae        | 0.0 | 0.0 |
| *                               | Saccharomyces      | Saccharomycetaceae   | 0.0 | 0.0 |
| Aphanomyces euteiches           | Aphanomyces        | Saprolegniaceae      | 0.0 | 0.0 |
| Ophiostoma piliferum            | Ophiostoma         | Ophiostomataceae     | 0.0 | 0.0 |
| Rhodotorula taiwanensis         | Rhodotorula        |                      | 0.0 | 0.0 |
| Trichosporon domesticum         | Trichosporon       |                      | 0.0 | 0.0 |
| Phoma herbarum                  | Phoma              | Didymellaceae        | 0.0 | 0.0 |
| Erysiphe alphitoides            | Erysiphe           | Erysiphaceae         | 0.0 | 0.0 |
| *                               | Leptosphaeria      | Leptosphaeriaceae    | 0.0 | 0.0 |
| Zymoseptoria tritici            | Zymoseptoria       | Mycosphaerellaceae   | 0.0 | 0.0 |
| Debaryomyces hansenii           | Debaryomyces       | Debaryomycetaceae    | 0.0 | 0.0 |
| Alternaria alternata            | Alternaria         | Pleosporaceae        | 0.0 | 0.0 |
| *                               | Phoma              | Didymellaceae        | 0.0 | 0.0 |
| *                               | Umbilicaria        | Umbilicariaceae      | 0.0 | 0.0 |
| *                               | Penicillium        | Aspergillaceae       | 0.0 | 0.0 |
| Wuchereria bancrofti            | Wuchereria         | Onchocercidae        | 0.0 | 0.0 |

|                              |               |                    |     |     |
|------------------------------|---------------|--------------------|-----|-----|
| Cladosporium cladosporioides | Cladosporium  | Cladosporiaceae    | 0.0 | 0.0 |
| Saccharomyces bayanus        | Saccharomyces | Saccharomycetaceae | 0.0 | 0.0 |
| Fusarium phaseoli            | Fusarium      | Nectriaceae        | 0.0 | 0.0 |
| Dasybranchus sp. DH1         | Dasybranchus  | Capitellidae       | 0.0 | 0.0 |
| Neofusicoccum parvum         | Neofusicoccum | Botryosphaeriaceae | 0.0 | 0.0 |
| *                            | Cladosporium  | Cladosporiaceae    | 0.0 | 0.0 |
| Penicillium rubens           | Penicillium   | Aspergillaceae     | 0.0 | 0.0 |
| Ustilago maydis              | Ustilago      | Ustilaginaceae     | 0.0 | 0.0 |
| Mucor circinelloides         | Mucor         | Mucoraceae         | 0.0 | 0.0 |
| Albugo laibachii             | Albugo        | Albuginaceae       | 0.0 | 0.0 |
